# Supplementary material for: Removal of phosphoglycolate in hyperthermophilic archaea
Source: PubMed Central journal article supplement — Proc Natl Acad Sci U S A. 2024 Apr 9;121(16):e2311390121. doi: 10.1073/pnas.2311390121 (PMC11032457; doi:10.1073/pnas.2311390121), 2024-04-09
Supplement: pnas.2311390121.sapp.pdf [file pnas.2311390121.sapp.pdf]

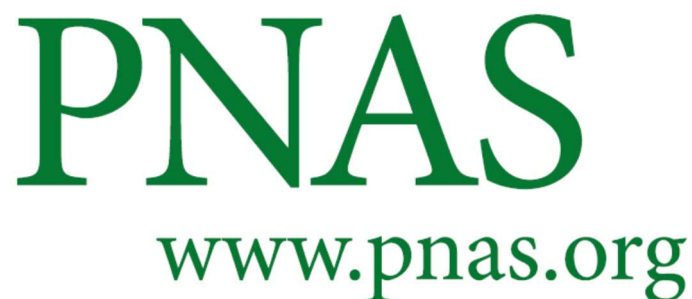

## **Supplementary Information for Removal of phosphoglycolate in hyperthermophilic archaea**

Yuta Michimori<sup>a,b</sup>, Rikihisa Izaki<sup>a</sup>, Yu Su<sup>a</sup>, Yuto Fukuyama<sup>c</sup>, Shigeru Shimamura<sup>d</sup>, Karin Nishimura<sup>a</sup>, Yuya Miwa<sup>a</sup>, Sotaro Hamakita<sup>a</sup>, Takahiro Shimosaka<sup>a,b</sup>, Yuki Makino<sup>a</sup>, Ryo Takeno<sup>a</sup>, Takaaki Sato<sup>a,e</sup>, Haruki Beppu<sup>a</sup>, Isaac Cann<sup>a,b,f</sup>, Tamotsu Kanai<sup>a</sup>, Takuro Nunoura<sup>c</sup>, and Haruyuki Atomi<sup>a,b,e,1</sup>.

<sup>a</sup>Department of Synthetic Chemistry and Biological Chemistry, Graduate School of Engineering, Kyoto University, Kyoto 615-8510, Japan.

<sup>b</sup>Top Global University Program, Department of Synthetic Chemistry and Biological Chemistry, Graduate School of Engineering, Kyoto University, Kyoto 615-8510, Japan.

<sup>c</sup>Research Center for Bioscience and Nanoscience, Japan Agency for Marine-Earth Science and Technology (JAMSTEC), Yokosuka 237-0061, Japan.

<sup>d</sup>Super-Cutting-Edge Grand and Advanced Research (SUGAR) Program, JAMSTEC, Yokosuka 237-0061, Japan.

<sup>e</sup>Integrated Research Center for Carbon Negative Science, Institute of Advanced Energy, Kyoto University, Uji 611-0011, Japan.

<sup>f</sup>Department of Animal Science, University of Illinois Urbana-Champaign, Urbana, IL 61801.

<sup>1</sup>To whom correspondence may be addressed.

**Email:** [atomi@sbchem.kyoto-u.ac.jp](mailto:atomi@sbchem.kyoto-u.ac.jp)

### **This PDF file includes:**

Supporting text  
Tables S1 to S6  
Figures S1 to S9  
SI References

## Supporting Information Text

### Results

#### Gene disruption of TK0150 and its effect on growth

5,10-Methylenetetrahydrofolate is known as a C1 donor for multiple reactions (1-4). As serine hydroxymethyltransferase reactions are reversible (1, 5), growth of  $\Delta$ TK0150 cells in the presence of serine is most likely due to the serine hydroxymethyltransferase reaction proceeding in the direction of 5,10-methylenetetrahydrofolate and glycine formation. In order to evaluate whether the serine auxotrophy observed in the  $\Delta$ TK0150 strain was due to a shortage of 5,10-methylenetetrahydrofolate and not an impairment in the serine biosynthesis pathway per se, we examined the effects of adding an alternative C1 donor to the medium. Ketopantoate is a precursor of CoA biosynthesis in *T. kodakarensis*, and is generated from ketoisovalerate by ketopantoate hydroxymethyltransferase (KPHMT) (**SI Appendix, Fig. S4B**) (6, 7). The addition of ketopantoate should be able to provide 5,10-methylenetetrahydrofolate through the reverse reaction catalyzed by KPHMT. When ketopantoate was supplemented into ASW-AA-S<sup>0</sup> without serine, growth of  $\Delta$ TK0150 was partially restored (**SI Appendix, Fig. S5B and Fig. S7A**), suggesting that 5,10-methylenetetrahydrofolate was generated from ketopantoate by the KPHMT reaction proceeding in the direction of ketoisovalerate formation. The lack of complete complementation is most likely due to insufficient levels of KPHMT activity to provide adequate levels of serine. To confirm that the KPHMT reaction was actually proceeding in the direction of ketoisovalerate generation, we examined valine auxotrophy. Wild-type *T. kodakarensis* does not harbor a pathway for valine biosynthesis, and displays valine auxotrophy. However, valine can be synthesized by an aminotransferase reaction with ketoisovalerate as an amino group acceptor. The TK0186 protein, described above, displays aminotransferase activity on ketoisovalerate. We can thus confirm the generation of ketoisovalerate through KPHMT activity by supplementing ketopantoate to the medium in the absence of valine. As shown in **SI Appendix, Fig. S7B**, the addition of ketopantoate, although with a decrease in growth rate, complemented the valine auxotrophy of *T. kodakarensis* KU216, indicating that KPHMT can function to generate ketoisovalerate from ketopantoate (**SI Appendix, Fig. S5C**). Interestingly, KU216 cells displayed higher growth rates when serine was additionally removed from the medium (**SI Appendix, Fig. S7C**). This can be explained by the fact that serine is also a C1 donor leading to 5,10-methylenetetrahydrofolate generation via serine hydroxymethyltransferase. Removal of serine would result in a decrease in 5,10-methylenetetrahydrofolate, pulling the ketopantoate hydroxymethyltransferase reaction towards 5,10-methylenetetrahydrofolate and ketoisovalerate generation (**SI Appendix, Fig. S5D**). When the  $\Delta$ TK0150 strain was grown under this condition, a decrease in cell yield was observed, similar to the results of the strain grown in medium without serine (**SI Appendix, Fig. S7A**). This is due to the fact that 5,10-methylenetetrahydrofolate can no longer be produced from glycine, and serine biosynthesis relies solely on the production of 5,10-methylenetetrahydrofolate from ketopantoate (**SI Appendix, Fig. S5D**).

### Methods

**Composition of growth medium.** ASW-YT-S<sup>0</sup> and ASW-YT-Pyr medium were composed of 0.8×ASW (8), 5.0 g L<sup>-1</sup> yeast extract, 5.0 g L<sup>-1</sup> tryptone, and 0.8 mg L<sup>-1</sup> resazurin with 2.0 g L<sup>-1</sup> elemental sulfur or 5.0 g L<sup>-1</sup> sodium pyruvate, respectively. ASW-AA-S<sup>0</sup> medium was composed of 0.8×ASW, a mixture of 20 amino acids, minerals, a mixture of vitamins (8), 0.8 mg L<sup>-1</sup> resazurin, and 2.0 g L<sup>-1</sup> elemental sulfur. Modified versions of these media, ASW-YT-m1 medium (**SI Appendix, Table S3**) and ASW-AA-m1 medium (**SI Appendix, Table S4**), were also used. Solid medium used to isolate transformants were based on ASW-AA-S<sup>0</sup> medium and supplemented with 10 g L<sup>-1</sup> Gelrite, 7.5 g L<sup>-1</sup> 5-fluoroorotic acid (5-FOA), 10 mg L<sup>-1</sup> uracil and 4.5 mL of 1 M NaOH. Elemental sulfur was replaced with 0.2% (v/v) polysulfide solution (8).

**Construction of gene expression plasmids.** The TK0683 and TK1734 coding regions with extensions homologous to the plasmid ends were amplified by PCR using *T. kodakarensis* KOD1 genomic DNA as a template and inserted into pET21a(+) expression plasmid (Merck KGaA, Darmstadt, Germany) by infusion cloning. TK0186, TK0551, TK1094 and TK2301 coding regions were amplified so that additional restriction sites were incorporated. After digestion with NdeI and EcoRI for TK0186 or BamHI for TK0551, TK1094 and TK2301, DNA fragments were ligated with pET21a(+) digested with the same enzymes. All plasmids were

sequenced, and respectively named pET-TK0683, pET-TK1734, pET-TK0186, pET-TK0551, pET-TK1094 and pET-TK2301. Primers used for plasmid construction are listed in **SI Appendix, Table S5**.

**Gene expression in *E. coli* and purification of the recombinant proteins.** *E. coli* BL21-CodonPlus(DE3)-RIL was transformed with pET-TK0683, pET-TK1734, pET-TK0186, pET-TK0551, pET-TK1094 or pET-TK2301. Transformants were cultivated in LB medium until OD<sub>660</sub> reached 0.4-0.8. Isopropyl-β-D-1-thiogalactopyranoside (0.1 mM) was added, and cultures were continued for another 4 h. As TK1094 protein was insoluble, cells harboring pET-TK1094 were cultivated at 37°C for 18 h without the addition of isopropyl-β-D-1-thiogalactopyranoside. Cells were collected by centrifugation (4°C, 5,000×g, 15 min), washed with 50 mM Tris-HCl (pH 8.0) containing 1% NaCl, and centrifuged again (4°C, 5,000×g, 15 min). Cells were re-suspended with 50 mM Tris-HCl (pH 7.5) and sonicated with TOMY UD-201 (TOMY SEIKO, Tokyo, Japan) (OUTPUT:4, DUTY:50, 20-30 min). After centrifugation (4°C, 20,400×g, 15 min), the supernatant was treated for 10 min at 90°C (TK1734 and TK2301) or 85°C (TK0186, TK0551, TK0683 and TK1094) and centrifuged (4°C, 15,000×g, 15 min) to remove thermolabile proteins.

For TK1734 and TK2301 proteins, supernatants were applied to a ResourceQ column (GE Healthcare, Little Chalfont, Buckinghamshire, UK) equilibrated with 50 mM Tris-HCl (pH 8.0 at 80°C). Proteins were eluted with a linear gradient of 0 to 1.0 M NaCl. Fractions including TK1734 or TK2301 protein were collected and centrifuged with an Amicon Ultra centrifugal filter unit (MWCO 3,000) (EMD Millipore, Billerica, MA, USA). Samples were then mixed with approximately equal volumes of 3 M (NH<sub>4</sub>)<sub>2</sub>SO<sub>4</sub> and separated by hydrophobic interaction chromatography (Resource ISO, GE Healthcare) equilibrated with 50 mM Tris-HCl (pH 8.0 at 80°C) containing 1.5 M (NH<sub>4</sub>)<sub>2</sub>SO<sub>4</sub>. Proteins were eluted with a linear gradient of 1.5 M to 0 M (NH<sub>4</sub>)<sub>2</sub>SO<sub>4</sub>. Fractions containing TK1734 or TK2301 protein were collected and centrifuged with an Amicon Ultra centrifugal filter unit (MWCO 3,000). Finally, proteins were applied to gel-filtration chromatography (Superdex 200 Increase 10/300 GL, GE Healthcare) and separated with a mobile phase of 50 mM Tris-HCl (pH 8.0 at 80°C) containing 0.15 M NaCl. TK0551 and TK0683 proteins were purified with the same procedures without the use of hydrophobic interaction chromatography. Different mobile phases were used for the anion exchange chromatography (50 mM Tris-HCl, pH 7.5 at room temperature) and gel-filtration chromatography (0.15 M NaCl, 50 mM Tris-HCl, pH 7.5 at room temperature). TK0186 and TK1094 proteins were purified with anion exchange chromatography and gel-filtration chromatography with the procedures described for the TK1734 and TK2301 proteins. Protein concentrations were determined with the Protein Assay System (Bio-Rad, Hercules, CA, USA) using bovine serum albumin (Thermo Fisher Scientific, Waltham, MA, USA) as a standard.

**Construction of gene disruption plasmids.** Coding regions of TK0150, TK0186, TK0551, TK0683, TK1734, and TK2301 with approximately 1,000 bps each of 5'- and 3'-flanking regions were amplified by PCR using *T. kodakarensis* KU216 genomic DNA as a template. Each fragment was ligated with HincII-digested pUD3 plasmid, containing a *pyrF* marker cassette. Inverse PCR was carried out to remove the regions to be deleted, and the amplified fragments were self-ligated. Sequences of the resulting six disruption plasmids were confirmed. Primers used for construction of the disruption plasmids are listed in **SI Appendix, Table S6**.

**Transformation of *T. kodakarensis*.** For gene disruption, *T. kodakarensis* KU216 ( $\Delta pyrF$ ) was used as the host strain. KU216 cells grown in ASW-YT-S<sup>0</sup> medium for 12 h at 85°C were harvested (4°C, 15,000×g, 5 min) from 3 mL culture. Cells were resuspended in 200 μL 0.8×ASW and kept on ice for 30 min. Three micrograms of the disruption plasmid were added to the cells and the mixture was kept on ice for 1 h. The mixture was subjected to heat shock for 45 s at 85°C and kept on ice for 10 min. The mixture was inoculated into uracil-free synthetic medium (ASW-AA-S<sup>0</sup> ( $\Delta TK0150$ ,  $\Delta TK0551$ ,  $\Delta TK0683$ ) or ASW-AA-m1-S<sup>0</sup> ( $\Delta TK0186$ ,  $\Delta TK1734$ ,  $\Delta TK2301$ )), and incubated at 85°C for 2 d. Cells were cultivated in the same medium for another 2 d to enrich transformants harboring the *pyrF* gene via single crossover insertion. Cells were spread onto solid medium (ASW-AA ( $\Delta TK0150$ ,  $\Delta TK0551$ ,  $\Delta TK0683$ ) or ASW-AA-m1 ( $\Delta TK0186$ ,  $\Delta TK1734$ ,  $\Delta TK2301$ )) with 0.75% 5-FOA and 10 μg mL<sup>-1</sup> uracil and incubated for 24 h to select cells whose *pyrF* gene was removed via a second recombination event. Genotypes of the obtained colonies were confirmed by PCR and DNA sequencing analysis. Primers used for analyses of deletion mutants are listed in **SI Appendix, Table S6**.

**Tracer-based metabolomic analysis with  $^{13}\text{C}$ -glycolate.** *T. kodakarensis* KU216 was grown in 10 mL ASW-YT-m1-Pyr supplemented with 0.08 mM  $\text{Na}_2\text{S}$  and 0.01% (w/v) 1,2- $^{13}\text{C}$ -labeled sodium glycolate. Cells were grown for 20 h, collected by centrifugation and washed with 5 mL 0.8 $\times$ ASW. Preparation of protein-derived amino acids from the cells and the conditions of subsequent analysis using Microfluidic capillary electrophoresis-mass spectrometry (CE-MS) are described in Fukuyama et al. (9). Briefly, protein-derived amino acids were prepared by hydrolyzation with 12N HCl. The purified protein-derived amino acids were analyzed by using a ZipChip CE system (908devices, Boston, MA, USA) coupled with an Orbitrap Fusion Tribrid mass spectrometer (Thermo Fisher Scientific). The obtained MS data was analyzed using Qual Browser in Xcalibur version 4.3.73.11.

**Glycolate measurement in the culture medium using LC-MS/MS.** *T. kodakarensis* KU216 was grown in 10 mL ASW-YT-m1-Pyr for 20 h under the microaerobic condition defined above. After cultivation, cells were removed by centrifugation (4°C, 5000 $\times$ g, 15 min) followed by filtration with a 0.2  $\mu\text{m}$  filter (Steradisc S-2502S; Kurabo Industries, Osaka, Japan). Glycolate concentrations were measured after derivatization with 3-nitrophenylhydrazine referring to a previous report (10). LC-MS/MS measurement was performed on an ExionLC liquid-chromatograph coupled with a quadrupole time-of flight mass spectrometer X500R QTOF system (SCIEX, Toronto, Canada) with an electrospray ionization source in negative ion mode. The samples were separated with an ACQUITY UPLC BEH C18 column (2.1 $\times$ 100 mm, 1.7  $\mu\text{m}$ ; Waters, Milford, MA) kept at 40°C using a mobile phase combination of water (A) and 0.01% formic acid in methanol (B). The gradient was started from 18% B, and the percentage of B was linearly raised to 90% in 15 min after injection at a flow rate of 0.2 mL min $^{-1}$ . During the analysis, samples were kept at 4°C in the auto sampler. The injection volume was 10  $\mu\text{L}$ . MS/MS data of glycolate were collected in multiple reaction monitoring (MRM) mode as the mass transition pair of  $m/z$  210.05 $\rightarrow$ 152.05. The capillary voltage and the collision energy voltage were set at 4000V and -30V, respectively. Quantitative analyses of glycolate based on MRM chromatograms were performed using SCIEX OS software ver 1.7.

**Glycolate detection in the culture medium using LC-high resolution MS (HRMS).** Glycolate in the culture medium was prepared as described previously with some modifications (11). Briefly, the culture medium was filtered with a 0.2- $\mu\text{m}$  filter and then acidified with 12 N HCl to a final concentration of 0.1 M. To concentrate glycolate, 2 mL of ethyl acetate was added to 12 mL of the sample. After shaking and phase separation, the organic solvent fraction was transferred to a 17-mL glass test tube, with repeated extraction of glycolate from the remaining aqueous fraction using another 2 mL of ethyl acetate. Glycolate was concentrated by evaporation under a  $\text{N}_2$  stream from the organic solvent fractions at room temperature. Measurement of exact mass of glycolate using LC-HRMS was performed with an UltiMate 3000RS liquid chromatography (Thermo Fisher Scientific) coupled to electrospray ionization high resolution mass spectrometry analysis on an Orbitrap Fusion Tribrid mass spectrometer (Thermo Fisher Scientific). Sample separations were performed with an Intraada Organic Acid column 3  $\mu\text{m}$  2.0  $\times$  150 mm, (Imtakt, Kyoto, Japan) with a linear gradient of 5%-95% solvent B (90% 100 mM ammonium formate, 10% acetonitrile, 0.1% formic acid) over 20 min with a constant flow of 200  $\mu\text{L}/\text{min}$ ; solvent A (10% acetonitrile, 0.1% formic acid). The column oven was set at 40°C. Full scan MS spectra were acquired in the Orbitrap mass analyzer (polarity: Negative,  $m/z$  range: 70–210, resolution:120,000 full width at half maximum (FWHM)) using internal calibration (EASY-IC). MS/MS spectra were acquired in the Orbitrap mass analyzer (mass range: Normal, scan range mode: Auto, resolution:15,000 FWHM) and Stepped Higher-energy collisional dissociation MS/MS fragmentation with normalized collision energy of 15%, 35% and 45%

**Table S1. Presence or absence of gene homologs of Rubisco and 2-PG phosphatase on various archaeal genomes.**

| Phylum                                | Genus                                | Organism                                       | Rubisco                                | PGP |
|---------------------------------------|--------------------------------------|------------------------------------------------|----------------------------------------|-----|
| Euryarchaeota                         | Methanocaldococcus                   | <i>Methanocaldococcus jannaschii</i>           |                                        |     |
|                                       |                                      | <i>Methanocaldococcus fervens</i>              |                                        |     |
|                                       |                                      | <i>Methanocaldococcus vulcanius</i>            |                                        |     |
|                                       |                                      | <i>Methanocaldococcus</i> sp. FS406-22         |                                        |     |
|                                       |                                      | <i>Methanocaldococcus infernus</i>             |                                        |     |
|                                       |                                      | <i>Methanocaldococcus bathoardescens</i>       |                                        |     |
|                                       |                                      | <i>Methanocaldococcus laevis</i> SG7           |                                        |     |
|                                       | <i>Methanocaldococcus laevis</i> SG1 |                                                |                                        |     |
|                                       | Methanotorris                        | <i>Methanotorris igneus</i>                    |                                        |     |
|                                       | Methanococcus                        | <i>Methanococcus maripaludis</i> S2            |                                        |     |
|                                       |                                      | <i>Methanococcus maripaludis</i> C5            |                                        |     |
|                                       |                                      | <i>Methanococcus maripaludis</i> C6            |                                        |     |
|                                       |                                      | <i>Methanococcus maripaludis</i> C7            |                                        |     |
|                                       |                                      | <i>Methanococcus maripaludis</i> X1            |                                        |     |
|                                       |                                      | <i>Methanococcus maripaludis</i> KA1           |                                        |     |
|                                       |                                      | <i>Methanococcus maripaludis</i> OS7           |                                        |     |
|                                       |                                      | <i>Methanococcus maripaludis</i> DSM 2067      |                                        |     |
|                                       |                                      | <i>Methanococcus aeolicus</i>                  |                                        |     |
|                                       |                                      | <i>Methanococcus vannielii</i>                 |                                        |     |
|                                       |                                      | <i>Methanococcus voltae</i>                    |                                        |     |
|                                       |                                      | Methanothermococcus                            | <i>Methanothermococcus okinawensis</i> |     |
|                                       | Methanofervidicoccus                 | <i>Methanofervidicoccus</i> sp. A16            |                                        |     |
|                                       | Methanothermobacter                  | <i>Methanothermobacter thermoautotrophicus</i> |                                        |     |
|                                       |                                      | <i>Methanothermobacter marburgensis</i>        |                                        |     |
|                                       |                                      | <i>Methanothermobacter wolfeii</i>             |                                        |     |
|                                       |                                      | <i>Methanothermobacter tenebrarum</i>          |                                        |     |
|                                       |                                      | <i>Methanothermobacter</i> sp. CaT2            |                                        |     |
|                                       |                                      | <i>Methanothermobacter</i> sp. EMTCatA1        |                                        |     |
|                                       |                                      | <i>Methanothermobacter</i> sp. MT-2            |                                        |     |
|                                       |                                      | <i>Methanothermobacter</i> sp. KEPCO-1         |                                        |     |
|                                       |                                      | <i>Methanothermobacter</i> sp. THM-1           |                                        |     |
|                                       |                                      | <i>Methanothermobacter</i> sp. THM-2           |                                        |     |
|                                       | Methanosphaera                       | <i>Methanosphaera stadmanae</i>                |                                        |     |
|                                       |                                      | <i>Methanosphaera</i> sp. BMS                  |                                        |     |
|                                       |                                      | <i>Methanosphaera</i> sp. ISO3-F5              |                                        |     |
|                                       | Methanobrevibacter                   | <i>Methanobrevibacter ruminantium</i>          |                                        |     |
|                                       |                                      | <i>Methanobrevibacter smithii</i>              |                                        |     |
|                                       |                                      | <i>Methanobrevibacter</i> sp. AbM4             |                                        |     |
|                                       |                                      | <i>Methanobrevibacter millerae</i>             |                                        |     |
|                                       |                                      | <i>Methanobrevibacter</i> sp. YE315            |                                        |     |
|                                       |                                      | <i>Methanobrevibacter olleyae</i>              |                                        |     |
|                                       |                                      | <i>Methanobrevibacter arboriphilus</i>         |                                        |     |
|                                       | Methanobacterium                     | <i>Methanobacterium</i> sp. TLL-48-HuF1        |                                        |     |
|                                       |                                      | <i>Methanobacterium lacus</i>                  |                                        |     |
|                                       |                                      | <i>Methanobacterium paludis</i>                |                                        |     |
|                                       |                                      | <i>Methanobacterium</i> sp. MB1                |                                        |     |
|                                       |                                      | <i>Methanobacterium formicicum</i> BRM9        |                                        |     |
|                                       |                                      | <i>Methanobacterium formicicum</i> DSM1535     |                                        |     |
|                                       |                                      | <i>Methanobacterium congolense</i>             |                                        |     |
|                                       |                                      | <i>Methanobacterium subterraneum</i>           |                                        |     |
|                                       |                                      | <i>Methanobacterium</i> sp. MZ-A1              |                                        |     |
|                                       |                                      | <i>Methanobacterium</i> sp. BRmetb2            |                                        |     |
|                                       |                                      | <i>Methanobacterium</i> sp. BAmetb5            |                                        |     |
|                                       |                                      | <i>Methanobacterium alkalithermotolerans</i>   |                                        |     |
|                                       |                                      | <i>Methanobacterium ferruginis</i>             |                                        |     |
|                                       | Methanothermus                       | <i>Methanothermus fervidus</i>                 |                                        |     |
|                                       | Methanopyrus                         | <i>Methanopyrus kandleri</i>                   |                                        |     |
|                                       | Archaeoglobus                        | <i>Archaeoglobus fulgidus</i> DSM 4304         |                                        |     |
|                                       |                                      | <i>Archaeoglobus fulgidus</i> DSM 8774         |                                        |     |
|                                       |                                      | <i>Archaeoglobus profundus</i>                 |                                        |     |
|                                       |                                      | <i>Archaeoglobus veneticus</i>                 |                                        |     |
|                                       | Ferroglobus                          | <i>Ferroglobus placidus</i>                    |                                        |     |
|                                       | Geoglobus                            | <i>Geoglobus acetivorans</i>                   |                                        |     |
|                                       |                                      | <i>Geoglobus ahangari</i>                      |                                        |     |
|                                       | Pyrococcus                           | <i>Pyrococcus furiosus</i> DSM 3638            |                                        |     |
|                                       |                                      | <i>Pyrococcus furiosus</i> COM1                |                                        |     |
|                                       |                                      | <i>Pyrococcus horikoshii</i>                   |                                        |     |
|                                       |                                      | <i>Pyrococcus abyssi</i>                       |                                        |     |
|                                       |                                      | <i>Pyrococcus</i> sp. NA2                      |                                        |     |
|                                       |                                      | <i>Pyrococcus yayanosii</i>                    |                                        |     |
|                                       |                                      | <i>Pyrococcus</i> sp. ST04                     |                                        |     |
|                                       |                                      | <i>Pyrococcus kukulkanii</i>                   |                                        |     |
|                                       |                                      | <i>Pyrococcus chitonophagus</i>                |                                        |     |
|                                       |                                      | <i>Thermococcus kodakarensis</i>               |                                        |     |
|                                       | Thermococcus                         | <i>Thermococcus onnurineus</i>                 |                                        |     |
|                                       |                                      | <i>Thermococcus gammatolerans</i>              |                                        |     |
|                                       |                                      | <i>Thermococcus sibiricus</i>                  |                                        |     |
|                                       |                                      | <i>Thermococcus barophilus</i>                 |                                        |     |
|                                       |                                      | <i>Thermococcus</i> sp. 4557                   |                                        |     |
|                                       |                                      | <i>Thermococcus</i> sp. AM4                    |                                        |     |
|                                       |                                      | <i>Thermococcus cleftensis</i>                 |                                        |     |
|                                       |                                      | <i>Thermococcus litoralis</i>                  |                                        |     |
|                                       |                                      | <i>Thermococcus paralvinellae</i>              |                                        |     |
|                                       |                                      | <i>Thermococcus nautili</i>                    |                                        |     |
|                                       |                                      | <i>Thermococcus eurythermalis</i>              |                                        |     |
|                                       |                                      | <i>Thermococcus guaymasensis</i>               |                                        |     |
|                                       |                                      | <i>Thermococcus</i> sp. 2319x1                 |                                        |     |
|                                       |                                      | <i>Thermococcus peptonophilus</i>              |                                        |     |
|                                       |                                      | <i>Thermococcus piezophilus</i>                |                                        |     |
|                                       |                                      | <i>Thermococcus gorgonarius</i>                |                                        |     |
|                                       |                                      | <i>Thermococcus celer</i>                      |                                        |     |
|                                       |                                      | <i>Thermococcus barossii</i>                   |                                        |     |
|                                       |                                      | <i>Thermococcus</i> sp. 5-4                    |                                        |     |
|                                       |                                      | <i>Thermococcus siculi</i>                     |                                        |     |
|                                       |                                      | <i>Thermococcus thioreducens</i>               |                                        |     |
|                                       |                                      | <i>Thermococcus profundus</i>                  |                                        |     |
|                                       |                                      | <i>Thermococcus radiotolerans</i>              |                                        |     |
|                                       |                                      | <i>Thermococcus pacificus</i>                  |                                        |     |
|                                       |                                      | <i>Thermococcus</i> sp. P6                     |                                        |     |
|                                       |                                      | <i>Thermococcus indicus</i>                    |                                        |     |
| <i>Thermococcus camini</i>            |                                      |                                                |                                        |     |
| <i>Thermococcus aciditolerans</i>     |                                      |                                                |                                        |     |
| <i>Thermococcus arginineproducing</i> |                                      |                                                |                                        |     |
| Palaeococcus                          |                                      | <i>Palaeococcus pacificus</i>                  |                                        |     |

| Phylum                          | Genus                                  | Organism                                        | Rubisco                             | PGP |  |
|---------------------------------|----------------------------------------|-------------------------------------------------|-------------------------------------|-----|--|
| Euryarchaeota                   | Methanosarcina                         | <i>Methanosarcina barkeri</i> Fusaro            |                                     |     |  |
|                                 |                                        | <i>Methanosarcina barkeri</i> MS                |                                     |     |  |
|                                 |                                        | <i>Methanosarcina barkeri</i> Wiesmoor          |                                     |     |  |
|                                 |                                        | <i>Methanosarcina barkeri</i> 227               |                                     |     |  |
|                                 |                                        | <i>Methanosarcina barkeri</i> 3                 |                                     |     |  |
|                                 |                                        | <i>Methanosarcina acetivorans</i>               |                                     |     |  |
|                                 |                                        | <i>Methanosarcina mazeri</i> Go1                |                                     |     |  |
|                                 |                                        | <i>Methanosarcina mazeri</i> Tuc01              |                                     |     |  |
|                                 |                                        | <i>Methanosarcina mazeri</i> S-6                |                                     |     |  |
|                                 |                                        | <i>Methanosarcina mazeri</i> C16                |                                     |     |  |
|                                 |                                        | <i>Methanosarcina vacuolata</i>                 |                                     |     |  |
|                                 |                                        | <i>Methanosarcina</i> sp. Kolksee               |                                     |     |  |
|                                 |                                        | <i>Methanosarcina lacustris</i>                 |                                     |     |  |
|                                 |                                        | <i>Methanosarcina</i> sp. MTP4                  |                                     |     |  |
|                                 |                                        | <i>Methanosarcina</i> sp. WH1                   |                                     |     |  |
|                                 |                                        | <i>Methanosarcina</i> sp. WWM596                |                                     |     |  |
|                                 |                                        | <i>Methanosarcina sicillae</i> C2J              |                                     |     |  |
|                                 |                                        | <i>Methanosarcina sicillae</i> H1350            |                                     |     |  |
|                                 |                                        | <i>Methanosarcina sicillae</i> T4/M             |                                     |     |  |
|                                 |                                        | <i>Methanosarcina thermophila</i> TM-1          |                                     |     |  |
|                                 |                                        | <i>Methanosarcina thermophila</i> CHTI-55       |                                     |     |  |
|                                 |                                        | <i>Methanosarcina horonobensis</i>              |                                     |     |  |
|                                 |                                        | <i>Methanosarcina flavescens</i>                |                                     |     |  |
|                                 |                                        | Methanococcoides                                | <i>Methanococcoides burtonii</i>    |     |  |
|                                 |                                        |                                                 | <i>Methanococcoides methylutens</i> |     |  |
|                                 |                                        |                                                 | <i>Methanococcoides orientis</i>    |     |  |
|                                 | Methanohalophilus                      | <i>Methanohalophilus mahii</i>                  |                                     |     |  |
|                                 |                                        | <i>Methanohalophilus halophilus</i>             |                                     |     |  |
|                                 | Methanohalobium                        | <i>Methanohalobium evestigatum</i>              |                                     |     |  |
|                                 | Methanosalsum                          | <i>Methanosalsum zhilinae</i>                   |                                     |     |  |
|                                 | Methanobolus                           | <i>Methanobolus psychrophilus</i>               |                                     |     |  |
|                                 |                                        | <i>Methanobolus zinderi</i>                     |                                     |     |  |
|                                 |                                        | <i>Methanobolus mangrovi</i>                    |                                     |     |  |
|                                 |                                        | <i>Methanobolus sediminis</i>                   |                                     |     |  |
|                                 | Methanomethylovorans                   | <i>Methanomethylovorans hollandica</i>          |                                     |     |  |
|                                 | Methanimicrococcus                     | <i>Methanimicrococcus</i> sp. HF6               |                                     |     |  |
|                                 |                                        | <i>Methanimicrococcus</i> sp. Es2               |                                     |     |  |
|                                 | Methanotherix                          | <i>Methanotherix thermoacetophila</i>           |                                     |     |  |
|                                 |                                        | <i>Methanotherix soelingensis</i>               |                                     |     |  |
|                                 |                                        | <i>Methanotherix harundinacea</i>               |                                     |     |  |
|                                 | Methanospirillum                       | <i>Methanospirillum hungatei</i>                |                                     |     |  |
|                                 | Methanocorpusculum                     | <i>Methanospirillum</i> sp. J.3.6.1-F.2.7.3     |                                     |     |  |
|                                 |                                        | <i>Methanocorpusculum labreanum</i>             |                                     |     |  |
|                                 | Methanoculleus                         | <i>Methanoculleus marisnigri</i>                |                                     |     |  |
|                                 |                                        | <i>Methanoculleus bourgensis</i> MS2            |                                     |     |  |
|                                 |                                        | <i>Methanoculleus bourgensis</i> MAB1           |                                     |     |  |
|                                 |                                        | <i>Methanoculleus chikugoensis</i>              |                                     |     |  |
|                                 |                                        | <i>Methanoculleus submarinus</i>                |                                     |     |  |
|                                 | Methanoculleus                         | <i>Methanoculleus receptaculi</i>               |                                     |     |  |
|                                 |                                        | <i>Methanoculleus petrolearia</i>               |                                     |     |  |
|                                 | Methanoplanus                          | <i>Methanoplanus endosymbiosus</i>              |                                     |     |  |
|                                 |                                        | <i>Methanoplanus</i> sp. FWC-SCC4               |                                     |     |  |
|                                 | Methanofollis                          | <i>Methanofollis aquaemaris</i>                 |                                     |     |  |
|                                 | Methanogenium                          | <i>Methanogenium organophilum</i>               |                                     |     |  |
|                                 |                                        | <i>Methanogenium</i> sp. S4BF                   |                                     |     |  |
|                                 | Methanomicrobium                       | <i>Methanomicrobium antiquum</i>                |                                     |     |  |
|                                 | Methanoregula                          | <i>Methanoregula boonei</i>                     |                                     |     |  |
|                                 |                                        | <i>Methanoregula formicica</i>                  |                                     |     |  |
|                                 | Methanosphaerula                       | <i>Methanosphaerula palustris</i>               |                                     |     |  |
|                                 |                                        | <i>Methanocella paludicola</i>                  |                                     |     |  |
|                                 | Methanocella                           | <i>Methanocella conradii</i>                    |                                     |     |  |
|                                 |                                        | <i>Methanocella arvorvazae</i>                  |                                     |     |  |
|                                 |                                        | <i>Methanocella salinarum</i> NRC-1             |                                     |     |  |
|                                 | Halobacterium                          | <i>Halobacterium salinarum</i> R1               |                                     |     |  |
|                                 |                                        | <i>Halobacterium salinarum</i> NRC-34001        |                                     |     |  |
|                                 |                                        | <i>Halobacterium</i> sp. DL1                    |                                     |     |  |
|                                 |                                        | <i>Halobacterium hubeiense</i>                  |                                     |     |  |
|                                 |                                        | <i>Halobacterium</i> sp. GSL-19                 |                                     |     |  |
|                                 |                                        | <i>Halobacterium</i> sp. BOL4-2                 |                                     |     |  |
|                                 |                                        | <i>Halobacterium noricense</i>                  |                                     |     |  |
|                                 |                                        | <i>Halobacterium litoreum</i>                   |                                     |     |  |
|                                 | Halodesulfurarchaeum                   | <i>Halodesulfurarchaeum formicicum</i> HTSR1    |                                     |     |  |
|                                 |                                        | <i>Halodesulfurarchaeum formicicum</i> HSR6     |                                     |     |  |
|                                 | Halanaeroarchaeum                      | <i>Halanaeroarchaeum sulfurreducens</i> HSR2    |                                     |     |  |
|                                 |                                        | <i>Halanaeroarchaeum sulfurreducens</i> M27-SA2 |                                     |     |  |
|                                 |                                        | <i>Halanaeroarchaeum</i> sp. HSR-CO             |                                     |     |  |
|                                 | Salarchaeum                            | <i>Salarchaeum</i> sp. JOR-1                    |                                     |     |  |
|                                 | Halarchaeum                            | <i>Halarchaeum</i> sp. CBA1220                  |                                     |     |  |
|                                 | Halalkalicoccus                        | <i>Halalkalicoccus jeotgali</i>                 |                                     |     |  |
|                                 | Halococcus                             | <i>Halococcus dombrowskii</i>                   |                                     |     |  |
|                                 | Halorussus                             | <i>Halorussus limi</i>                          |                                     |     |  |
|                                 |                                        | <i>Halorussus gelatinilyticus</i>               |                                     |     |  |
|                                 |                                        | <i>Halorussus saliacus</i>                      |                                     |     |  |
|                                 |                                        | <i>Halorussus vallis</i>                        |                                     |     |  |
|                                 | Salinarchaeum                          | <i>Salinarchaeum</i> sp. Harcht-Bsk1            |                                     |     |  |
| <i>Salinarchaeum</i> sp. IM2453 |                                        |                                                 |                                     |     |  |
| Natranaeroarchaeum              | <i>Natranaeroarchaeum sulfidigenes</i> |                                                 |                                     |     |  |
| Haloarcula                      | <i>Haloarcula marismortui</i>          |                                                 |                                     |     |  |
|                                 | <i>Haloarcula hispanica</i> ATCC 33960 |                                                 |                                     |     |  |
|                                 | <i>Haloarcula hispanica</i> N601       |                                                 |                                     |     |  |
|                                 | <i>Haloarcula</i> sp. CBA1115          |                                                 |                                     |     |  |
|                                 | <i>Haloarcula taiwanensis</i>          |                                                 |                                     |     |  |
|                                 | <i>Haloarcula</i> sp. JP-L23           |                                                 |                                     |     |  |
| Natronomonas                    | <i>Haloarcula sinaiensis</i>           |                                                 |                                     |     |  |
|                                 | <i>Natronomonas pharaonis</i>          |                                                 |                                     |     |  |
|                                 | <i>Natronomonas moolapensis</i>        |                                                 |                                     |     |  |
|                                 | <i>Natronomonas halophila</i>          |                                                 |                                     |     |  |
| Halorhabdus                     | <i>Natronomonas salina</i>             |                                                 |                                     |     |  |
|                                 | <i>Halorhabdus utahensis</i>           |                                                 |                                     |     |  |
|                                 | <i>Halorhabdus tiamatea</i>            |                                                 |                                     |     |  |
|                                 | <i>Halorhabdus</i> sp. CBA1104         |                                                 |                                     |     |  |
|                                 | <i>Halorhabdus</i> sp. SVX81           |                                                 |                                     |     |  |
| <i>Halorhabdus</i> sp. BNX81    |                                        |                                                 |                                     |     |  |

| Phylum                       | Genus                                            | Organism                                                         | Rubisco                        | PGP |  |
|------------------------------|--------------------------------------------------|------------------------------------------------------------------|--------------------------------|-----|--|
| Euryarchaeota                | Halomicrobium                                    | <i>Halomicrobium mukohataei</i>                                  |                                |     |  |
|                              |                                                  | <i>Halomicrobium mukohataei</i> JP60                             |                                |     |  |
|                              |                                                  | <i>Halomicrobium</i> sp. LC1Hm                                   |                                |     |  |
|                              |                                                  | <i>Halomicrobium</i> sp. ZPS1                                    |                                |     |  |
|                              |                                                  | <i>Halorientalis</i> sp. IM1011                                  |                                |     |  |
|                              | Halapricum                                       | <i>Halapricum salinum</i>                                        |                                |     |  |
|                              |                                                  | <i>Halapricum desulfuricans</i>                                  |                                |     |  |
|                              | Halosimplex                                      | <i>Halosimplex rubrum</i>                                        |                                |     |  |
|                              |                                                  | <i>Halosimplex pelagicum</i>                                     |                                |     |  |
|                              |                                                  | <i>Halosimplex litoreum</i>                                      |                                |     |  |
|                              | Halococcoides                                    | <i>Halococcoides cellulovorans</i>                               |                                |     |  |
|                              | Salinirubellus                                   | <i>Salinirubellus salinus</i>                                    |                                |     |  |
|                              | Halocatena                                       | <i>Halocatena salina</i>                                         |                                |     |  |
|                              | Haloquadratum                                    | <i>Haloquadratum walsbyi</i> DSM 16790                           |                                |     |  |
|                              |                                                  | <i>Haloquadratum walsbyi</i> C23                                 |                                |     |  |
|                              | Haloferax                                        | <i>Haloferax volcanii</i>                                        |                                |     |  |
|                              |                                                  | <i>Haloferax mediterranei</i>                                    |                                |     |  |
|                              |                                                  | <i>Haloferax gibbonsii</i>                                       |                                |     |  |
|                              |                                                  | <i>Haloferax alexandrinus</i>                                    |                                |     |  |
|                              |                                                  | <i>Haloferax larsenii</i>                                        |                                |     |  |
|                              |                                                  | <i>Haloferax lucentense</i>                                      |                                |     |  |
|                              | Halogeometricum                                  | <i>Halogeometricum borinquense</i>                               |                                |     |  |
|                              |                                                  | <i>Haloplanus rubicundus</i> CBA1112                             |                                |     |  |
|                              | Haloplanus                                       | <i>Haloplanus rubicundus</i> CBA1113                             |                                |     |  |
|                              |                                                  | <i>Haloplanus aerogenes</i>                                      |                                |     |  |
|                              |                                                  | <i>Haloplanus rillus</i>                                         |                                |     |  |
|                              | Halobellus                                       | <i>Halobellus limi</i>                                           |                                |     |  |
|                              | Haloprofundus                                    | <i>Haloprofundus</i> sp. MHR1                                    |                                |     |  |
|                              |                                                  | <i>Halorubrum lacusprofundi</i>                                  |                                |     |  |
|                              | Halorubrum                                       | <i>Halorubrum</i> sp. PV6                                        |                                |     |  |
|                              |                                                  | <i>Halorubrum</i> sp. BQL3-1                                     |                                |     |  |
|                              |                                                  | <i>Halorubrum ezzemoulense</i>                                   |                                |     |  |
|                              |                                                  | <i>Halorubrum</i> sp. CBA1229                                    |                                |     |  |
|                              |                                                  | <i>Halorubrum sodomense</i>                                      |                                |     |  |
|                              |                                                  | <i>Halorubrum salinarum</i>                                      |                                |     |  |
|                              |                                                  | <i>Halorubrum</i> sp. 2020YC2                                    |                                |     |  |
|                              |                                                  | <i>Salinigranum</i>                                              | <i>Salinigranum rubrum</i>     |     |  |
|                              |                                                  | Halohasta                                                        | <i>Halohasta litchfieldiae</i> |     |  |
|                              |                                                  | Halolamina                                                       | <i>Halolamina</i> sp. CBA1230  |     |  |
|                              | <i>Halobaculum halophilum</i>                    |                                                                  |                                |     |  |
|                              | Halobaculum                                      | <i>Halobaculum salinum</i>                                       |                                |     |  |
|                              |                                                  | <i>Halobaculum magnesiphilum</i>                                 |                                |     |  |
|                              |                                                  | <i>Halobaculum roseum</i>                                        |                                |     |  |
|                              |                                                  | <i>Halobaculum rubrum</i>                                        |                                |     |  |
|                              |                                                  | <i>Halobaculum</i> sp. CBA1158                                   |                                |     |  |
|                              | Halalkaliarchaeum                                | <i>Halalkaliarchaeum desulfuricum</i>                            |                                |     |  |
|                              |                                                  | <i>Halalkaliarchaeum</i> sp. AArc-CO                             |                                |     |  |
|                              | unclassified Haloferacales                       | Halophilic archaeon DL31                                         |                                |     |  |
|                              | Haloterrigena                                    | <i>Haloterrigena turkmenica</i>                                  |                                |     |  |
|                              |                                                  | <i>Haloterrigena salifodinae</i>                                 |                                |     |  |
|                              |                                                  | <i>Haloterrigena alkaliphila</i>                                 |                                |     |  |
|                              | Natrialba                                        | <i>Natrialba magadii</i>                                         |                                |     |  |
|                              | Natripiger                                       | <i>Natripiger xanaduensis</i>                                    |                                |     |  |
|                              |                                                  | <i>Natripiger</i> sp. J7-2                                       |                                |     |  |
|                              |                                                  | <i>Natripiger pellirubrum</i>                                    |                                |     |  |
|                              |                                                  | <i>Natripiger versiforme</i>                                     |                                |     |  |
|                              |                                                  | <i>Natripiger pallidum</i>                                       |                                |     |  |
|                              |                                                  | <i>Natripiger zhovii</i>                                         |                                |     |  |
|                              |                                                  | <i>Natripiger halophilum</i>                                     |                                |     |  |
|                              |                                                  | <i>Natripiger thermotolerans</i>                                 |                                |     |  |
| <i>Natripiger longum</i>     |                                                  |                                                                  |                                |     |  |
| Natronobacterium             |                                                  | <i>Natronobacterium gregoryi</i>                                 |                                |     |  |
| Halovivax                    | <i>Halovivax ruber</i>                           |                                                                  |                                |     |  |
| Natronosalvus                | <i>Natronosalvus rutilus</i>                     |                                                                  |                                |     |  |
|                              | <i>Natronosalvus halobius</i>                    |                                                                  |                                |     |  |
| Natronococcus                | <i>Natronococcus occultus</i>                    |                                                                  |                                |     |  |
| Halostagnicola               | <i>Halostagnicola larsenii</i>                   |                                                                  |                                |     |  |
| Halobiforma                  | <i>Halobiforma laciisalsi</i>                    |                                                                  |                                |     |  |
|                              | <i>Natrarchaeobaculum aegyptiacum</i>            |                                                                  |                                |     |  |
| Natrarchaeobaculum           | <i>Natrarchaeobaculum sulfurreducens</i> AArc-Mg |                                                                  |                                |     |  |
|                              | <i>Natrarchaeobaculum sulfurreducens</i> AArc1   |                                                                  |                                |     |  |
|                              | Natrialbaeae archaeon AArc-T1-2                  |                                                                  |                                |     |  |
| Natronorubrum                | <i>Natronorubrum bangense</i>                    |                                                                  |                                |     |  |
|                              | <i>Natronorubrum aibiense</i>                    |                                                                  |                                |     |  |
|                              | <i>Natronorubrum daqingense</i>                  |                                                                  |                                |     |  |
| unclassified Nanohaloarchaea | Nanohaloarchaea archaeon SG9                     |                                                                  |                                |     |  |
| Methanoliparum               | <i>Candidatus Methanoliparum</i> sp. LAM-1       |                                                                  |                                |     |  |
| Methanonatronarchaeum        | <i>Methanonatronarchaeum</i> sp. AMET6-2         |                                                                  |                                |     |  |
|                              | <i>Methanonatronarchaeum</i> sp. AMET-SI         |                                                                  |                                |     |  |
| Thermoplasmatota             | Thermoplasma                                     | <i>Thermoplasma acidophilum</i>                                  |                                |     |  |
|                              |                                                  | <i>Thermoplasma volcanium</i>                                    |                                |     |  |
|                              | Picrophilus                                      | <i>Picrophilus oshimae</i>                                       |                                |     |  |
|                              | Ferroplasma                                      | <i>Ferroplasma acidarmanus</i>                                   |                                |     |  |
|                              |                                                  | <i>Ferroplasma acidiphilum</i>                                   |                                |     |  |
|                              | Cuniculiplasma                                   | <i>Cuniculiplasma divulgatum</i>                                 |                                |     |  |
|                              | unclassified Thermoplasmatales                   | Thermoplasmatales archaeon BRNA1                                 |                                |     |  |
|                              | Methanomethylophilus                             | <i>Methanomethylophilus alvi</i>                                 |                                |     |  |
|                              | Methanomassiliococcus                            | <i>Candidatus Methanomassiliococcus intestinalis</i> Issoire-Mx1 |                                |     |  |
|                              | Methanoplasma                                    | <i>Candidatus Methanoplasma termillum</i>                        |                                |     |  |
|                              | Methanogranum                                    | <i>Candidatus Methanogranum</i> sp. U3.2.1                       |                                |     |  |
|                              | unclassified Thermoplasmata                      | Methanogenic archaeon ISO4-H5                                    |                                |     |  |
|                              | Aciduliprofundum                                 | <i>Aciduliprofundum boonei</i>                                   |                                |     |  |
|                              |                                                  | <i>Aciduliprofundum</i> sp. MAR08-339                            |                                |     |  |

| Phylum         | Genus                            | Organism                                      | Rubisco                                              | PGP                                      |  |  |
|----------------|----------------------------------|-----------------------------------------------|------------------------------------------------------|------------------------------------------|--|--|
| Thermoproteota | Aeropyrum                        | <i>Aeropyrum pernix</i>                       |                                                      |                                          |  |  |
|                |                                  | <i>Aeropyrum camini</i>                       |                                                      |                                          |  |  |
|                | Staphylothermus                  | <i>Staphylothermus marinus</i>                |                                                      |                                          |  |  |
|                |                                  | <i>Staphylothermus hellenicus</i>             |                                                      |                                          |  |  |
|                | Ignicoccus                       | <i>Ignicoccus hospitalis</i>                  |                                                      |                                          |  |  |
|                |                                  | <i>Ignicoccus islandicus</i>                  |                                                      |                                          |  |  |
|                |                                  | <i>Ignicoccus pacificus</i>                   |                                                      |                                          |  |  |
|                | Desulfurococcus                  | <i>Desulfurococcus amylolyticus</i> 1221n     |                                                      |                                          |  |  |
|                |                                  | <i>Desulfurococcus amylolyticus</i> DSM 16532 |                                                      |                                          |  |  |
|                |                                  | <i>Desulfurococcus mucosus</i>                |                                                      |                                          |  |  |
|                | Thermosphaera                    | <i>Thermosphaera aggregans</i>                |                                                      |                                          |  |  |
|                | Ignisphaera                      | <i>Ignisphaera aggregans</i>                  |                                                      |                                          |  |  |
|                | Thermoglaucus                    | <i>Thermoglaucus calderae</i>                 |                                                      |                                          |  |  |
|                | Hyperthermus                     | <i>Hyperthermus butylicus</i>                 |                                                      |                                          |  |  |
|                | Pyrolobus                        | <i>Pyrolobus fumarii</i>                      |                                                      |                                          |  |  |
|                | Pyrodictium                      | <i>Pyrodictium delaneyi</i>                   |                                                      |                                          |  |  |
|                |                                  | <i>Pyrodictium abyssi</i>                     |                                                      |                                          |  |  |
|                | Pyrofoliis                       | <i>Pyrofoliis japonicus</i>                   |                                                      |                                          |  |  |
|                | Sulfurisphaera                   | <i>Sulfurisphaera tokodaii</i>                |                                                      |                                          |  |  |
|                |                                  | <i>Sulfurisphaera ohwakuensis</i>             |                                                      |                                          |  |  |
|                | Saccharolobus                    |                                               | <i>Saccharolobus solfataricus</i> P2                 |                                          |  |  |
|                |                                  |                                               | <i>Saccharolobus solfataricus</i> 98/2               |                                          |  |  |
|                |                                  |                                               | <i>Saccharolobus solfataricus</i> SULA               |                                          |  |  |
|                |                                  |                                               | <i>Saccharolobus solfataricus</i> SARC-B             |                                          |  |  |
|                |                                  |                                               | <i>Saccharolobus solfataricus</i> SARC-C             |                                          |  |  |
|                |                                  |                                               | <i>Saccharolobus shibatae</i>                        |                                          |  |  |
|                |                                  |                                               | <i>Saccharolobus caldissimus</i>                     |                                          |  |  |
|                |                                  | Sulfolobus                                    |                                                      | <i>Sulfolobus acidocaldarius</i> DSM 639 |  |  |
|                |                                  |                                               |                                                      | <i>Sulfolobus acidocaldarius</i> N8      |  |  |
|                |                                  |                                               |                                                      | <i>Sulfolobus acidocaldarius</i> Ron12/I |  |  |
|                |                                  |                                               | <i>Sulfolobus acidocaldarius</i> SUSAZ               |                                          |  |  |
|                |                                  |                                               | <i>Sulfolobus islandicus</i> L.S.2.15                |                                          |  |  |
|                |                                  |                                               | <i>Sulfolobus islandicus</i> M.14.25                 |                                          |  |  |
|                |                                  |                                               | <i>Sulfolobus islandicus</i> M.16.27                 |                                          |  |  |
|                |                                  |                                               | <i>Sulfolobus islandicus</i> M.16.4                  |                                          |  |  |
|                |                                  |                                               | <i>Sulfolobus islandicus</i> Y.G.57.14               |                                          |  |  |
|                |                                  |                                               | <i>Sulfolobus islandicus</i> Y.N.15.51               |                                          |  |  |
|                |                                  |                                               | <i>Sulfolobus islandicus</i> L.D.8.5                 |                                          |  |  |
|                |                                  |                                               | <i>Sulfolobus islandicus</i> HVE10/4                 |                                          |  |  |
|                |                                  |                                               | <i>Sulfolobus islandicus</i> REY15A                  |                                          |  |  |
|                |                                  |                                               | <i>Sulfolobus islandicus</i> LAL14/1                 |                                          |  |  |
|                |                                  |                                               | <i>Sulfolobus</i> sp. A20                            |                                          |  |  |
|                |                                  |                                               | <i>Sulfolobus</i> sp. E5-1-F                         |                                          |  |  |
|                |                                  |                                               | <i>Sulfolobus</i> sp. E11-6                          |                                          |  |  |
|                |                                  |                                               | <i>Sulfolobus</i> sp. S-194                          |                                          |  |  |
|                | Metallosphaera                   |                                               |                                                      | <i>Metallosphaera sedula</i> DSM 5348    |  |  |
|                |                                  |                                               |                                                      | <i>Metallosphaera sedula</i> MJ1HA       |  |  |
|                |                                  |                                               | <i>Metallosphaera cuprina</i>                        |                                          |  |  |
|                |                                  |                                               | <i>Metallosphaera hakonensis</i> JCM 8857 = DSM 7519 |                                          |  |  |
|                |                                  |                                               | <i>Metallosphaera prunae</i>                         |                                          |  |  |
|                |                                  |                                               | <i>Metallosphaera tengchongensis</i>                 |                                          |  |  |
|                |                                  |                                               | <i>Metallosphaera javensis</i>                       |                                          |  |  |
|                | Acidianus                        |                                               | <i>Acidianus hospitalis</i>                          |                                          |  |  |
|                |                                  |                                               | <i>Acidianus manzaensis</i>                          |                                          |  |  |
|                |                                  |                                               | <i>Acidianus brierleyi</i>                           |                                          |  |  |
|                |                                  |                                               | <i>Acidianus sulfidivorans</i>                       |                                          |  |  |
|                |                                  |                                               | <i>Acidianus ambivalens</i>                          |                                          |  |  |
|                |                                  | <i>Acidianus</i> sp. HS-5                     |                                                      |                                          |  |  |
|                | Sulfodiococcus                   | <i>Sulfodiococcus acidophilus</i>             |                                                      |                                          |  |  |
|                | Stygiolobus                      |                                               | <i>Stygiolobus azoricus</i>                          |                                          |  |  |
|                |                                  |                                               | <i>Stygiolobus caldivivus</i>                        |                                          |  |  |
|                | Sulfuracidifex                   |                                               | <i>Sulfuracidifex tepidarius</i>                     |                                          |  |  |
|                |                                  |                                               | <i>Sulfuracidifex metallicus</i>                     |                                          |  |  |
|                | unclassified Sulfolobales        | <i>Sulfolobales</i> archaeon HS-7             |                                                      |                                          |  |  |
|                | Pyrobaculum                      |                                               | <i>Pyrobaculum aerophilum</i>                        |                                          |  |  |
|                |                                  |                                               | <i>Pyrobaculum islandicum</i>                        |                                          |  |  |
|                |                                  |                                               | <i>Pyrobaculum caldifontis</i>                       |                                          |  |  |
|                |                                  |                                               | <i>Pyrobaculum arsenaticum</i>                       |                                          |  |  |
|                |                                  |                                               | <i>Pyrobaculum ferrireducens</i>                     |                                          |  |  |
|                |                                  |                                               | <i>Pyrobaculum oguniense</i>                         |                                          |  |  |
|                |                                  |                                               | <i>Pyrobaculum neutrophilum</i>                      |                                          |  |  |
|                |                                  | <i>Pyrobaculum</i> sp. WP30                   |                                                      |                                          |  |  |
|                | Caldivirga                       | <i>Caldivirga maquilingensis</i>              |                                                      |                                          |  |  |
| Thermoproteus  |                                  | <i>Thermoproteus tenax</i>                    |                                                      |                                          |  |  |
|                |                                  | <i>Thermoproteus uzoniensis</i>               |                                                      |                                          |  |  |
| Vulcanisaeta   |                                  | <i>Vulcanisaeta distributa</i>                |                                                      |                                          |  |  |
|                |                                  | <i>Vulcanisaeta moutnovskia</i>               |                                                      |                                          |  |  |
|                |                                  | <i>Vulcanisaeta souniana</i>                  |                                                      |                                          |  |  |
| Thermofilum    |                                  | <i>Thermofilum pendens</i>                    |                                                      |                                          |  |  |
|                |                                  | <i>Thermofilum adornatum</i> 1910b            |                                                      |                                          |  |  |
|                |                                  | <i>Thermofilum adornatum</i> 1505             |                                                      |                                          |  |  |
| Infirmifilum   |                                  | <i>Infirmifilum uzonense</i>                  |                                                      |                                          |  |  |
|                |                                  | <i>Infirmifilum lucidum</i>                   |                                                      |                                          |  |  |
| Acidilobus     | <i>Acidilobus saccharovorans</i> |                                               |                                                      |                                          |  |  |
|                | <i>Acidilobus</i> sp. 7A         |                                               |                                                      |                                          |  |  |
| Caldisphaera   | <i>Caldisphaera lagunensis</i>   |                                               |                                                      |                                          |  |  |
| Feravidicoccus | <i>Feravidicoccus fontis</i>     |                                               |                                                      |                                          |  |  |



| Phylum               | Genus                         | Organism                                          | Rubisco                                   | PGP |  |
|----------------------|-------------------------------|---------------------------------------------------|-------------------------------------------|-----|--|
| Nitrososphaerota     | Nitrosopumilus                | <i>Nitrosopumilus maritimus</i>                   |                                           |     |  |
|                      |                               | Candidatus <i>Nitrosopumilus sediminis</i>        |                                           |     |  |
|                      |                               | Candidatus <i>Nitrosopumilus koreensis</i>        |                                           |     |  |
|                      |                               | <i>Nitrosopumilus pranensis</i>                   |                                           |     |  |
|                      |                               | <i>Nitrosopumilus adriaticus</i>                  |                                           |     |  |
|                      |                               | Candidatus <i>Nitrosopumilus</i> sp. SW           |                                           |     |  |
|                      |                               | <i>Nitrosopumilus cobalaminigenes</i>             |                                           |     |  |
|                      |                               | <i>Nitrosopumilus oxycliniae</i>                  |                                           |     |  |
|                      |                               | <i>Nitrosopumilus ureiphilus</i>                  |                                           |     |  |
|                      |                               | <i>Nitrosopumilus</i> sp. K4                      |                                           |     |  |
|                      |                               | <i>Nitrosopumilus zosteriae</i>                   |                                           |     |  |
|                      |                               | Nitrosomarinus                                    | Candidatus <i>Nitrosomarinus catalina</i> |     |  |
|                      |                               | Nitrosarchaeum                                    | <i>Nitrosarchaeum</i> sp. AC2             |     |  |
|                      | Nitrososphaera                | Candidatus <i>Nitrososphaera qarqensis</i>        |                                           |     |  |
|                      |                               | <i>Nitrososphaera viennensis</i>                  |                                           |     |  |
|                      | Nitrosocosmicus               | Candidatus <i>Nitrosocosmicus evergladensis</i>   |                                           |     |  |
|                      |                               | Candidatus <i>Nitrosocosmicus oleophilus</i>      |                                           |     |  |
|                      | Nitrosocaldus                 | Candidatus <i>Nitrosocaldus franklandus</i>       |                                           |     |  |
|                      |                               | Candidatus <i>Nitrosocaldus cavascurensis</i>     |                                           |     |  |
|                      | Cenarchaeum                   | <i>Cenarchaeum symbiosum</i>                      |                                           |     |  |
|                      | Caldarchaeum                  | Candidatus <i>Caldarchaeum subterraneum</i>       |                                           |     |  |
|                      | Nitrosopelagicus              | Candidatus <i>Nitrosopelagicus brevis</i>         |                                           |     |  |
|                      | Nitrosotenuis                 | Candidatus <i>Nitrosotenuis cloacae</i>           |                                           |     |  |
|                      |                               | Candidatus <i>Nitrosotenuis</i> sp. DW1           |                                           |     |  |
|                      |                               | Candidatus <i>Nitrosotenuis chungbukensis</i>     |                                           |     |  |
|                      | Nitrosotalea                  | Candidatus <i>Nitrosotalea devanaterra</i>        |                                           |     |  |
| Conexivisphaera      | <i>Conexivisphaera calida</i> |                                                   |                                           |     |  |
| Korarchaeota         | Korarchaeum                   | Candidatus <i>Korarchaeum cryptofillum</i>        |                                           |     |  |
| Bathyarchaeota       | unclassified Bathyarchaeota   | Candidatus <i>Bathyarchaeota</i> archaeon BA1     |                                           |     |  |
|                      |                               | Candidatus <i>Bathyarchaeota</i> archaeon BA2     |                                           |     |  |
| Nanoarchaeota        | Nanoarchaeum                  | <i>Nanoarchaeum equitans</i>                      |                                           |     |  |
|                      | Nanopusillus                  | Candidatus <i>Nanopusillus acidilobi</i>          |                                           |     |  |
|                      | Nanobdella                    | <i>Nanobdella aerobiophila</i>                    |                                           |     |  |
| Micrarchaeota        | Mancarchaeum                  | Candidatus <i>Mancarchaeum acidiphilum</i> Mia14  |                                           |     |  |
|                      | Fermentimicrarchaeum          | Candidatus <i>Fermentimicrarchaeum limneticum</i> |                                           |     |  |
|                      | Micrarchaeum                  | Candidatus <i>Micrarchaeum</i> sp. A DKE          |                                           |     |  |
| Nanohaloarchaeota    | Nanohalobium                  | Candidatus <i>Nanohalobium constans</i>           |                                           |     |  |
| Lokiarchaeota        | Lokiarchaeum                  | Candidatus <i>Lokiarchaeum</i> sp. GC14 75        |                                           |     |  |
|                      |                               | Candidatus <i>Lokiarchaeum</i> sp. B-35           |                                           |     |  |
|                      |                               | Candidatus <i>Prometheoarchaeum syntrophicum</i>  |                                           |     |  |
| unclassified Archaea |                               | Archaeon GW2011 AR10                              |                                           |     |  |
|                      |                               | Archaeon GW2011 AR20                              |                                           |     |  |

The presence of a gene homolog is indicated in black.

**Table S2. List of strains and plasmids.**

| Strain or plasmid                | Relevant characteristic(s)                                                                                                                                                                                           | Source or reference       |
|----------------------------------|----------------------------------------------------------------------------------------------------------------------------------------------------------------------------------------------------------------------|---------------------------|
| <b>Strains</b>                   |                                                                                                                                                                                                                      |                           |
| <i>Escherichia coli</i>          |                                                                                                                                                                                                                      |                           |
| DH5 $\alpha$                     | <i>supE44 <math>\Delta</math>lacU169 (<math>\Phi</math>80 lacZ <math>\Delta</math>M15) hsdR17 recA1 endA1 gyrA96 thi-1 relA1</i>                                                                                     | Stratagene (La Jolla, CA) |
| BL21-CodonPlus(DE3)-RIL          | <i>E. coli</i> B F <sup>-</sup> <i>ompT hsdS</i> (r <sub>65</sub> <sup>-</sup> m <sub>55</sub> <sup>-</sup> ) dcm <sup>+</sup> Tet <sup>r</sup> gal $\lambda$ (DE3) <i>endA Hte (argU ileY leuW Cam<sup>r</sup>)</i> | Stratagene                |
| <i>Thermococcus kodakarensis</i> |                                                                                                                                                                                                                      |                           |
| KOD1                             | Wild-type                                                                                                                                                                                                            | (12)                      |
| KU216*                           | KOD1 $\Delta$ <i>pyrF</i>                                                                                                                                                                                            | (13)                      |
| $\Delta$ TK0150-3*               | KU216 $\Delta$ TK0150                                                                                                                                                                                                | This study                |
| $\Delta$ TK0150-26               | KU216 $\Delta$ TK0150                                                                                                                                                                                                | This study                |
| $\Delta$ TK0186-17*              | KU216 $\Delta$ TK0186                                                                                                                                                                                                | This study                |
| $\Delta$ TK0186-25               | KU216 $\Delta$ TK0186                                                                                                                                                                                                | This study                |
| $\Delta$ TK0186-28               | KU216 $\Delta$ TK0186                                                                                                                                                                                                | This study                |
| $\Delta$ TK0186-33               | KU216 $\Delta$ TK0186                                                                                                                                                                                                | This study                |
| $\Delta$ TK0548*                 | KU216 $\Delta$ TK0548                                                                                                                                                                                                | (14)                      |
| $\Delta$ TK0551-1*               | KU216 $\Delta$ TK0551                                                                                                                                                                                                | This study                |
| $\Delta$ TK0551-2                | KU216 $\Delta$ TK0551                                                                                                                                                                                                | This study                |
| $\Delta$ TK0683-13*              | KU216 $\Delta$ TK0683                                                                                                                                                                                                | This study                |
| $\Delta$ TK0683-15               | KU216 $\Delta$ TK0683                                                                                                                                                                                                | This study                |
| $\Delta$ TK1094*                 | KU216 $\Delta$ TK1094                                                                                                                                                                                                | (15)                      |
| $\Delta$ TK1734-2*               | KU216 $\Delta$ TK1734                                                                                                                                                                                                | This study                |
| $\Delta$ TK1734-4                | KU216 $\Delta$ TK1734                                                                                                                                                                                                | This study                |
| $\Delta$ TK1734-5                | KU216 $\Delta$ TK1734                                                                                                                                                                                                | This study                |
| $\Delta$ TK1734-6                | KU216 $\Delta$ TK1734                                                                                                                                                                                                | This study                |
| $\Delta$ TK2268*                 | KU216 $\Delta$ TK2268                                                                                                                                                                                                | (14)                      |
| $\Delta$ TK2301-1*               | KU216 $\Delta$ TK2301                                                                                                                                                                                                | This study                |
| $\Delta$ TK2301-2                | KU216 $\Delta$ TK2301                                                                                                                                                                                                | This study                |
| $\Delta$ TK2301-3                | KU216 $\Delta$ TK2301                                                                                                                                                                                                | This study                |
| $\Delta$ TK2301-4                | KU216 $\Delta$ TK2301                                                                                                                                                                                                | This study                |
| <b>Plasmids</b>                  |                                                                                                                                                                                                                      |                           |
| pUC118                           | Amp <sup>r</sup> general cloning vector                                                                                                                                                                              | Takara (Kyoto, Japan)     |
| pUD3                             | pUC118 derivative; <i>pyrF</i> marker cassette ( <i>P<sub>pyrF</sub>::pyrF</i> )                                                                                                                                     | (16)                      |
| pUDTK0150                        | pUD3 derivative; TK0150 disruption vector                                                                                                                                                                            | This study                |
| pUDTK0186                        | pUD3 derivative; TK0186 disruption vector                                                                                                                                                                            | This study                |
| pUDTK0551                        | pUD3 derivative; TK0551 disruption vector                                                                                                                                                                            | (17)                      |
| pUDTK0683                        | pUD3 derivative; TK0683 disruption vector                                                                                                                                                                            | (17)                      |
| pUDTK1734                        | pUD3 derivative; TK1734 disruption vector                                                                                                                                                                            | This study                |
| pUDTK2301                        | pUD3 derivative; TK2301 disruption vector                                                                                                                                                                            | This study                |
| pET-21a(+)                       | Amp <sup>r</sup> general expression vector                                                                                                                                                                           | Novagen (Madison, Wis)    |
| pET-TK0186                       | pET-21a(+) derivative; TK0186                                                                                                                                                                                        | This study                |
| pET-TK0551                       | pET-21a(+) derivative; TK0551                                                                                                                                                                                        | This study                |
| pET-TK0683                       | pET-21a(+) derivative; TK0683                                                                                                                                                                                        | This study                |
| pET-TK1734                       | pET-21a(+) derivative; TK1734                                                                                                                                                                                        | This study                |
| pET-TK2301                       | pET-21a(+) derivative; TK2301                                                                                                                                                                                        | This study                |

*T. kodakarensis* mutant strains with asterisk were used for activity measurement of cell extracts or growth experiments.

**Table S3. Composition of ASW-YT-m1 medium.**

| Component                                       | Concentration (mg L <sup>-1</sup> ) |
|-------------------------------------------------|-------------------------------------|
| NaCl                                            | 16000                               |
| MgCl <sub>2</sub> ·6H <sub>2</sub> O            | 2400                                |
| MgSO <sub>4</sub> ·7H <sub>2</sub> O            | 4800                                |
| (NH <sub>4</sub> ) <sub>2</sub> SO <sub>4</sub> | 800                                 |
| NaHCO <sub>3</sub>                              | 160                                 |
| CaCl <sub>2</sub> ·2H <sub>2</sub> O            | 240                                 |
| KCl                                             | 400                                 |
| KH <sub>2</sub> PO <sub>4</sub>                 | 336                                 |
| NaBr                                            | 40                                  |
| SrCl <sub>2</sub> ·6H <sub>2</sub> O            | 16                                  |
| Fe(NH <sub>4</sub> )citrate                     | 8                                   |
| KI                                              | 3.32                                |
| H <sub>3</sub> BO <sub>3</sub>                  | 1.236                               |
| NiCl <sub>2</sub> ·6H <sub>2</sub> O            | 2.38                                |
| Yeast extract                                   | 5000                                |
| Tryptone                                        | 5000                                |
| Resazurin                                       | 0.8                                 |

**Table S4. Composition of ASW-AA-m1 medium.**

| Component                                       | Concentration (mg L <sup>-1</sup> ) | Component                                           | Concentration (µg L <sup>-1</sup> ) |
|-------------------------------------------------|-------------------------------------|-----------------------------------------------------|-------------------------------------|
| NaCl                                            | 16000                               | MnSO <sub>4</sub> ·5H <sub>2</sub> O                | 2500                                |
| MgCl <sub>2</sub> ·6H <sub>2</sub> O            | 2400                                | CoCl <sub>2</sub>                                   | 500                                 |
| MgSO <sub>4</sub> ·7H <sub>2</sub> O            | 4800                                | ZnSO <sub>4</sub>                                   | 500                                 |
| (NH <sub>4</sub> ) <sub>2</sub> SO <sub>4</sub> | 800                                 | CuSO <sub>4</sub> ·5H <sub>2</sub> O                | 50                                  |
| NaHCO <sub>3</sub>                              | 160                                 | AlK(SO <sub>4</sub> ) <sub>2</sub>                  | 50                                  |
| CaCl <sub>2</sub> ·2H <sub>2</sub> O            | 240                                 | H <sub>3</sub> BO <sub>3</sub>                      | 50                                  |
| KCl                                             | 400                                 | Na <sub>2</sub> MoO <sub>4</sub> ·2H <sub>2</sub> O | 50                                  |
| KH <sub>2</sub> PO <sub>4</sub>                 | 336                                 | Nicotinic acid                                      | 400                                 |
| NaBr                                            | 40                                  | Biotin                                              | 160                                 |
| SrCl <sub>2</sub> ·6H <sub>2</sub> O            | 16                                  | Calcium pantothenate                                | 400                                 |
| Fe(NH <sub>4</sub> )citrate                     | 8                                   | Lipoic acid                                         | 400                                 |
| KI                                              | 3.32                                | Folic acid                                          | 160                                 |
| H <sub>3</sub> BO <sub>3</sub>                  | 1.236                               | <i>p</i> -Aminobenzoic acid                         | 400                                 |
| NiCl <sub>2</sub> ·6H <sub>2</sub> O            | 2.38                                | Thiamine                                            | 400                                 |
| Resazurin                                       | 0.8                                 | Riboflavin                                          | 400                                 |
| L-Alanine                                       | 75                                  | Pyridoxine                                          | 400                                 |
| L-Cysteine·HCl·H <sub>2</sub> O                 | 250                                 | Cobalamin                                           | 400                                 |
| L-Aspartic acid                                 | 50                                  |                                                     |                                     |
| L-Glutamic acid                                 | 200                                 |                                                     |                                     |
| L-Phenylalanine                                 | 75                                  |                                                     |                                     |
| Glycine                                         | 200                                 |                                                     |                                     |
| L-Histidine·HCl·H <sub>2</sub> O                | 100                                 |                                                     |                                     |
| L-Isoleucine                                    | 100                                 |                                                     |                                     |
| L-Lysine·HCl                                    | 100                                 |                                                     |                                     |
| L-Leucine                                       | 100                                 |                                                     |                                     |
| L-Methionine                                    | 75                                  |                                                     |                                     |
| L-Asparagine·H <sub>2</sub> O                   | 100                                 |                                                     |                                     |
| L-Proline                                       | 125                                 |                                                     |                                     |
| L-Glutamine                                     | 50                                  |                                                     |                                     |
| L-Arginine·HCl                                  | 250                                 |                                                     |                                     |
| L-Serine                                        | 75                                  |                                                     |                                     |
| L-Threonine                                     | 100                                 |                                                     |                                     |
| L-Valine                                        | 200                                 |                                                     |                                     |
| L-Tryptophan                                    | 75                                  |                                                     |                                     |
| L-Tyrosine                                      | 100                                 |                                                     |                                     |

**Table S5. List of primers used for expression vector construction in this study.**

| Use                                | Gene      | Type | Primer name              | 5'-sequence-3'                                 |
|------------------------------------|-----------|------|--------------------------|------------------------------------------------|
| For expression vector construction | TK0186    | A    | TK0186-f                 | TTTTGGATCCCATATGCAGGAAAAGCTTGAGAACAA           |
|                                    |           |      | TK0186-r                 | TTTGAATTCCTCACTTGAGCTTCTTTATCTCCTCCTC          |
|                                    | TK0551    | A    | ldhA1-F                  | GGGCATATGAGGCCGAGAGTTCTTGTGACATTTAAG           |
|                                    |           |      | ldhA1-R                  | GGGGATCCTCACAGCATCTTAACCTCTCCGGCGGGCG          |
|                                    | TK0683    | A    | ldhA2-infusion-F         | GAAGGAGATATACATATGAGGCCTAAGGTTTTTCATAACCCGTGCC |
|                                    |           |      | ldhA2-infusion-R         | GCTCGAATTCGGATCTCAGAAGCCGGGTTTTCTAACCTTCACGAC  |
|                                    | TK1734    | A    | TK1734-infusion-f        | AAGGAGATATACATATGACGAGAAAAATCGGCATTATCTTCG     |
|                                    |           |      | TK1734-infusion-r        | GCTCGAATTCGGATCCCTAAAGGGCAGCCTCCAGATACCTT      |
|                                    | TK2301    | A    | TK2301-f                 | GGGCATATGACAATAAAGGCAATATCTGTCTG               |
|                                    |           |      | TK2301-r                 | GGGGATCCTCAGGCTTTTTCTCCGGGGAGATAT              |
| For DNA sequencing of target gene  | TK0186    | B    | TK0186seqF1              | TACGGAATCCCAATGAGCAAG                          |
|                                    |           |      | TK0186seqF2              | ATGAGCCTCGAGAGGAGAAAGC                         |
|                                    |           |      | TK0186seqF3              | GAAGACGGCCACCTCGACAG                           |
|                                    | TK0551    | B    | TK0551seqF1              | AAGTACGCCGACGTTGATTT                           |
|                                    |           |      | TK0551seqF2              | AAGCTCATCAGGAGGGGTGA                           |
|                                    |           |      | TK0551seqF3              | GAAAGAATTAAGCTCCTTGA                           |
|                                    |           |      | TK0551seqR1              | TTCCCTGTTACGAGGTCTT                            |
|                                    |           |      | TK0551seqR2              | CTCGTTGATGATATGGTAGG                           |
|                                    |           |      | TK0551seqR3              | GTCGGTGTAACGAACCTCC                            |
|                                    | TK0683    | B    | TK0683seqF1              | GAGCACTTGAGGTTGAGGT                            |
|                                    |           |      | TK0683seqF2              | GAGGCCGACCACTTCACCCG                           |
|                                    |           |      | TK0683seqF3              | ATGATAAACGAGGAAAGGCT                           |
|                                    |           |      | TK0683seqR1              | GAGGGTCGGAGGTACTTAC                            |
|                                    |           |      | TK0683seqR2              | GTA CTGGTTT CCTTAGTCA                          |
|                                    |           |      | TK0683seqR3              | TATCAGCCTCCTGGCCGTTG                           |
|                                    | TK1734    | B    | TK1734seqF               | CGAGAAGCTCAAGTACGGAACGCTCG                     |
|                                    |           |      | TK1734seqR               | CGAGCGTCCGTA CTGAGCTTCTCGTAGGTTAAC             |
|                                    | TK2301    | B    | TK2301seqF               | AGCTGAAAAAGAGGTATCCCGAGGCTC                    |
|                                    |           |      | TK2301seqR               | GAGTATCCACTCCTCGTCCATGTTGGTCAGGTAGA            |
|                                    | universal | C    | T7Pmodified              | CGCGAAATTAATACGACTCACTATAGG                    |
| T7Tmodified                        |           |      | CCAAGGGTTATGCTAGTTATTGCT |                                                |

A: Primers for amplifying target gene to be overexpressed in *E. coli* with appropriate restriction sites. Underlined sequences indicate the restriction sites.

B: Primers annealing within the target genes.

C: Primers annealing outside of multi cloning region including NdeI, EcoRI and BamHI sites and used for sequencing target genes.

**Table S6. List of primers used for genetic analysis in this study.**

| Use                                  | Gene                                                             | Type         | Primer name                | 5'-sequence-3'                  |                             |
|--------------------------------------|------------------------------------------------------------------|--------------|----------------------------|---------------------------------|-----------------------------|
| For disruption vector construction   | TK0150                                                           | D            | pTK0150F                   | ATACACTTTGGTGAGAAAAAGAAAAAGTTCA |                             |
|                                      |                                                                  |              | pTK0150R                   | ACCAGCTCCGCAGTCTCCACGGCCCTCAT   |                             |
|                                      |                                                                  |              | D1fTK0150                  | TGGGCTTTTTCTTCTTCATTATTTCCCTTAT |                             |
|                                      |                                                                  | TK0186       | D                          | U1fTK0150                       | GAACATCACCGTCCATGGTTGCAACTT |
|                                      |                                                                  |              |                            | dTK0186F1                       | GACCTCCGTTGGATCGCGCATC      |
|                                      |                                                                  |              |                            | dTK0186R1                       | GCTACTACTACCTCCCAAAGG       |
|                                      | TK1734                                                           |              | E                          | dTK0186F2                       | AGTTCTACAAGCCGAGGAGG        |
|                                      |                                                                  |              |                            | dTK0186R2                       | CGACTATCATTACCTCGACCTTGC    |
|                                      |                                                                  |              |                            | dTK1734F1                       | CCAGCGCCGTTATCCCGAAAC       |
|                                      |                                                                  | TK2301       | D                          | dTK1734R1                       | AGCGAGAACACGGAGTGCCTTG      |
|                                      |                                                                  |              |                            | dTK1734F2                       | ATGGACGCAGGAGAGCTCATAAAGAAG |
|                                      |                                                                  |              |                            | dTK1734R2                       | GAGGGAAAAGAGGAAGAGGG        |
|                                      | E                                                                |              | dTK2301F1                  | AGGGTTGAGCAGGTGAGTATC           |                             |
|                                      |                                                                  |              | dTK2301R1                  | CCACAACCTGGCTGATAGCG            |                             |
|                                      |                                                                  |              | dTK2301F2                  | AGGGTGGTTGCATGTTC AAG           |                             |
|                                      | For DNA sequencing of 5'- and 3'-flanking regions of target gene | TK0150       | F                          | dTK2301R2                       | TTATCTCACCCGAAAATGAGGG      |
|                                      |                                                                  |              |                            | TK0150sqf1                      | CCTATAAAAGCTCTCTTTG         |
|                                      |                                                                  |              |                            | TK0150sqf2                      | ATCCAGAATCGTCGCCCTTG        |
| TK0150sqr1                           |                                                                  |              |                            | AATAACAGGAGGAGAGTATA            |                             |
| TK0150sqr2                           |                                                                  |              |                            | AGGACAACCTGCAAGGAGCGT           |                             |
| dTK0186seqF1                         |                                                                  |              |                            | CGGAGGAGAAGATTAGGG AAG          |                             |
| TK0186                               |                                                                  | F            | dTK0186seqF2               | GTGCTATT CAGCCCTGAGGGAGATC      |                             |
|                                      |                                                                  |              | dTK0186seqF3               | GAAATCCGAAAAGCCATAAAAC          |                             |
|                                      |                                                                  |              | dTK0186seqF4               | GCATTGAGTCCACCCGACGAG           |                             |
|                                      |                                                                  |              | dTK0186seqF5               | GATGAAGGCTTCTGAGGTTAGGG         |                             |
|                                      |                                                                  |              | dTK0186seqR1               | CCCTAACCTCAGAAGCCTTCATC         |                             |
|                                      |                                                                  |              | dTK0186seqR2               | TTCCAAGCGTTAATGTACAAAAAG        |                             |
|                                      |                                                                  |              | dTK0186seqR3               | CGAGTCTGGAAGAGATG               |                             |
|                                      |                                                                  |              | dTK0186seqR4               | CGACGTCATAATGACTCAC             |                             |
|                                      |                                                                  |              | SEQldhA1-F1                | CGAAGTCTGCGGTAGTTG              |                             |
|                                      |                                                                  |              | SEQldhA1-F2                | AACCTGATGAGCGGCCTCG             |                             |
|                                      |                                                                  |              | SEQldhA1-F3                | AGGGCCGGGAAGAGAACCCTC           |                             |
|                                      |                                                                  |              | SEQldhA1-F4                | TTTCCCGGTTTCTCCAAAAG            |                             |
| TK0551                               | F                                                                | SEQldhA1-R1  | GGTTTGTTCTCGTGTTC A        |                                 |                             |
|                                      |                                                                  | SEQldhA1-R2  | ATCGTCAATTC AATGTGGA       |                                 |                             |
|                                      |                                                                  | SEQldhA1-R3  | CCCCTTGCCAGCTTCAGCA        |                                 |                             |
|                                      |                                                                  | SEQldhA1-R4  | AAGACCGTAGGGTT CAGGA       |                                 |                             |
|                                      |                                                                  | SEQldhA2-F1  | CCCTAATGAGCTTCGGTGC G      |                                 |                             |
|                                      |                                                                  | SEQldhA2-F2  | CCTCTCGGCCTTTGGAGCA        |                                 |                             |
| TK0683                               | F                                                                | SEQldhA2-F3  | GGAAACCTGATACCGCTCCT       |                                 |                             |
|                                      |                                                                  | SEQldhA2-F4  | AACACAGAAAGT GAGCGCTT      |                                 |                             |
|                                      |                                                                  | SEQldhA2-R1  | ATTTCCCTTCAATTT CACG       |                                 |                             |
|                                      |                                                                  | SEQldhA2-R2  | CCTCGCGGTCAGCTTCCCT        |                                 |                             |
|                                      |                                                                  | SEQldhA2-R3  | GTCTCGGGTGAATCGTATGA       |                                 |                             |
|                                      |                                                                  | SEQldhA2-R4  | ATCAGTCCTTATAAACTGA        |                                 |                             |
| TK1734                               | F                                                                | dTK1734seqF1 | AAACATGCGTACGAACTCTACAC    |                                 |                             |
|                                      |                                                                  | dTK1734seqF2 | GTTTATCAATTATGACAGGGGTG    |                                 |                             |
|                                      |                                                                  | dTK1734seqF3 | CGCTTCCAGTTGCCA AACTCT     |                                 |                             |
|                                      |                                                                  | dTK1734seqR1 | GTTTCAAGATTTACTCAAAAAC     |                                 |                             |
|                                      |                                                                  | dTK1734seqR2 | AGAGTTGGCAACTGGAAGCG       |                                 |                             |
|                                      |                                                                  | dTK2301seqF1 | CTGTAACGGTTCTCGCCATC       |                                 |                             |
| TK2301                               | F                                                                | dTK2301seqF2 | CCCTCTGGCCACGGGTATC        |                                 |                             |
|                                      |                                                                  | dTK2301seqF3 | GTTTCAGTCCCGCTCTTTGGGTTCCG |                                 |                             |
|                                      |                                                                  | dTK2301seqR1 | GCGTCTTTT CATACCTCAG       |                                 |                             |
|                                      |                                                                  | dTK2301seqR2 | CGAACCCAAAAGCGGACCTGAAAC   |                                 |                             |
|                                      |                                                                  | M4S          | CTGGCGAAAGGGGATGTGC        |                                 |                             |
|                                      |                                                                  | RVS          | ACACTTTATGCTTCCGGCTC       |                                 |                             |
| For PCR analysis of gene disruptants | TK0150                                                           | H            | dTK0150outF                | AAAGTGGAGTGAAGTACCACTGAGCTT     |                             |
|                                      |                                                                  |              | dTK0150outR                | CCTTCGACGCTATCACCGCCGTTT        |                             |
|                                      |                                                                  | I            | dTK0150inF                 | ATGATCGAAGTCGGGGAATACAAGGTCA    |                             |
|                                      |                                                                  |              | dTK0150inR                 | TCAAAGGCTCCTCAGGTATTCGGCGTAGG   |                             |
|                                      | TK0186                                                           | H            | dTK0186outF                | TACTCCGGTGGAGTAAAGTCAAAGGC      |                             |
|                                      |                                                                  |              | dTK0186outR                | TCCACCCTCAAGCTCAGGCCGACTC       |                             |
|                                      |                                                                  | I            | dTK0186inF                 | CAGGAAGCCAGCAGGCGCT             |                             |
|                                      |                                                                  |              | dTK0186inR                 | CGATGACCCTTGG AATGTGC           |                             |
|                                      | TK0551                                                           | H            | CHDldhA1-F                 | TCGGCTATCTCAGGAGCATAGGCGAAAACG  |                             |
|                                      |                                                                  |              | CHDldhA1-R                 | ACTCCCGCTCCCGGTAGGCCAGAAGCTCAT  |                             |
|                                      |                                                                  | I            | CHldhA1-F                  | GAGTTCTTGTGACATTTAAGATGAAGAGCA  |                             |
|                                      |                                                                  |              | CHldhA1-R                  | TTCCGGCGGGCGAACCTT CACGACTTCCCT |                             |
|                                      | TK0683                                                           | H            | CHDldhA2-F                 | ATACTCGTTGGAACGCAGATAGGGGCTGGA  |                             |
|                                      |                                                                  |              | CHDldhA2-R                 | TTTGAAGCTCCTCTCTGAGCTTTGGAAGG   |                             |
|                                      |                                                                  | I            | CHldhA2-F                  | AGGTTTTTCATAACCCGTGCCATTCCCGAGA |                             |
|                                      |                                                                  |              | CHldhA2-R                  | GGTTTTTCAACCTTCACGACTTCTCTTATTC |                             |
|                                      | TK1734                                                           | H            | dTK1734outF                | ATCCCAATCGTAGTTCTCTGGCATAAC     |                             |
|                                      |                                                                  |              | dTK1734outR                | AACCTTCCGTCGTACTCATCG           |                             |
|                                      |                                                                  | I            | dTK1734inF                 | ATGACGAGAAAATCGGCATTATCTTC      |                             |
|                                      |                                                                  |              | dTK1734inR                 | CTAAAGGGCAGCCTCCAGATAC          |                             |
|                                      | TK2301                                                           | H            | dTK2301outF                | AAGAGCCTATCCCTTCAATCTTTG        |                             |
|                                      |                                                                  |              | dTK2301outR                | CATAGGCTACTACCGCCCGC            |                             |
|                                      |                                                                  | I            | dTK2301inF                 | ATGACAATAAGGCAATATCTGTGCG       |                             |
|                                      |                                                                  |              | dTK2301inR                 | TCAGTCTTTTCTCCGGGG              |                             |

D: Primers for amplifying target genes and their 5'- and 3'-flanking regions.

E: Primers for inverse PCR amplifying 5'- and 3'-flanking regions and entire plasmid to exclude target genes.

F: Primers for sequencing 5'- or 3'-flanking region of target genes.

G: Primers annealing outside of multi cloning site of pUD3.

H: Primers annealing outside of homologous regions for homologous recombination.  
I: Primers annealing within the target genes.

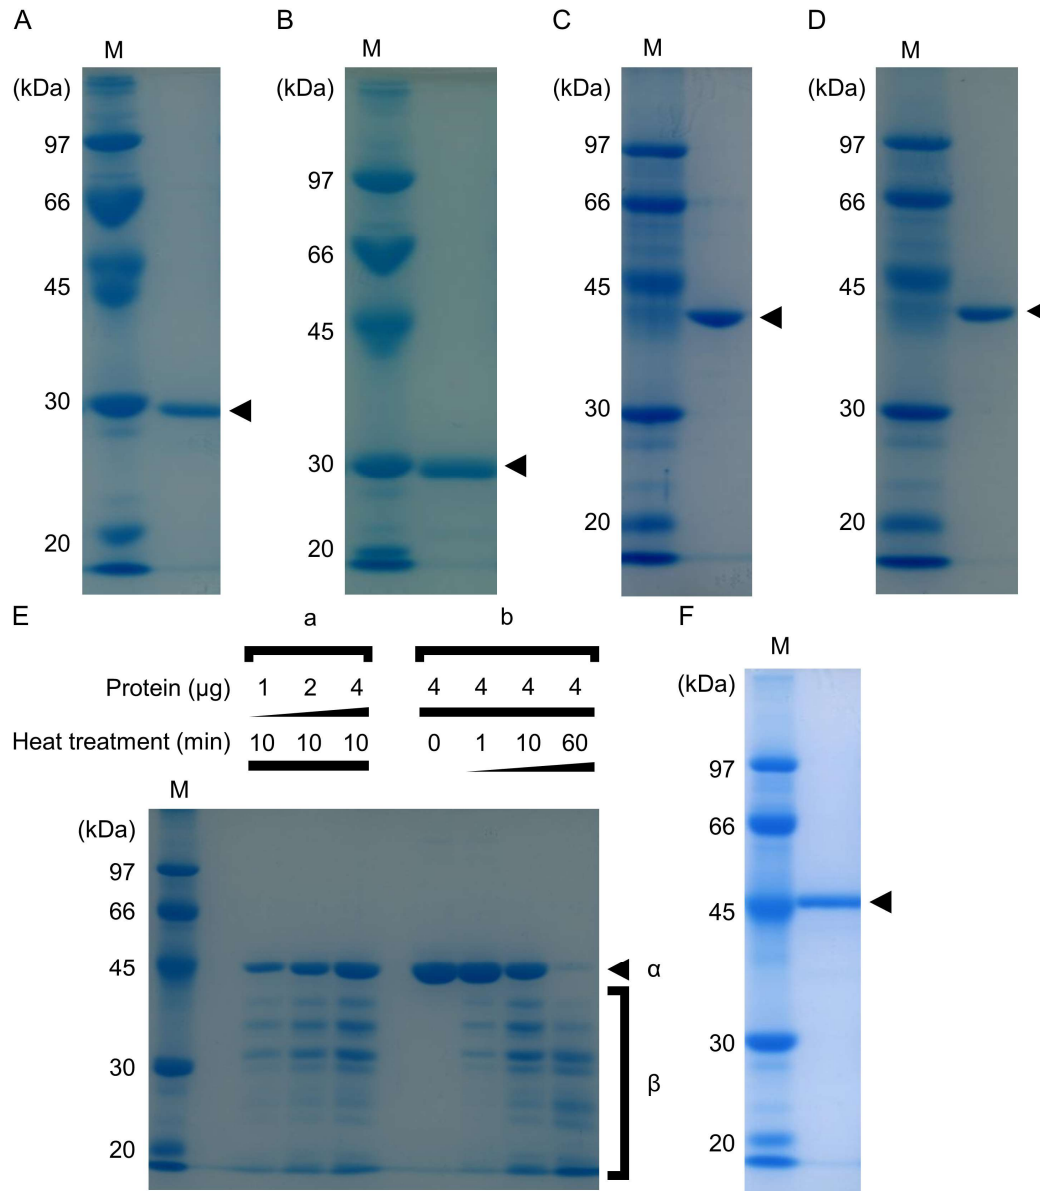

**Fig. S1. SDS-PAGE analysis of the purified recombinant proteins.** (A to D and F) The genes TK1734 (A), TK2301 (B), TK0551 (C), TK0683 (D) and TK1094 (F) were expressed in *E. coli* and the recombinant proteins were purified with procedures described in the Methods section. The homogeneity of each sample was analyzed by SDS-PAGE and stained with Coomassie Brilliant Blue. M represents molecular weight marker. (E) The recombinant protein of TK0186 expressed in *E. coli* was purified as described in the Methods section and analyzed by SDS-PAGE/Coomassie Brilliant Blue staining. M represents molecular weight marker. (a) Different amounts of protein were incubated at 98°C for 10 min in SDS-PAGE buffer. (b) Protein samples mixed with SDS-PAGE buffer were incubated at 98°C for various periods of time. (α) Main protein band corresponding to intact TK0186 protein, (β) low molecular weight proteins corresponding to fragments of the TK0186 protein.



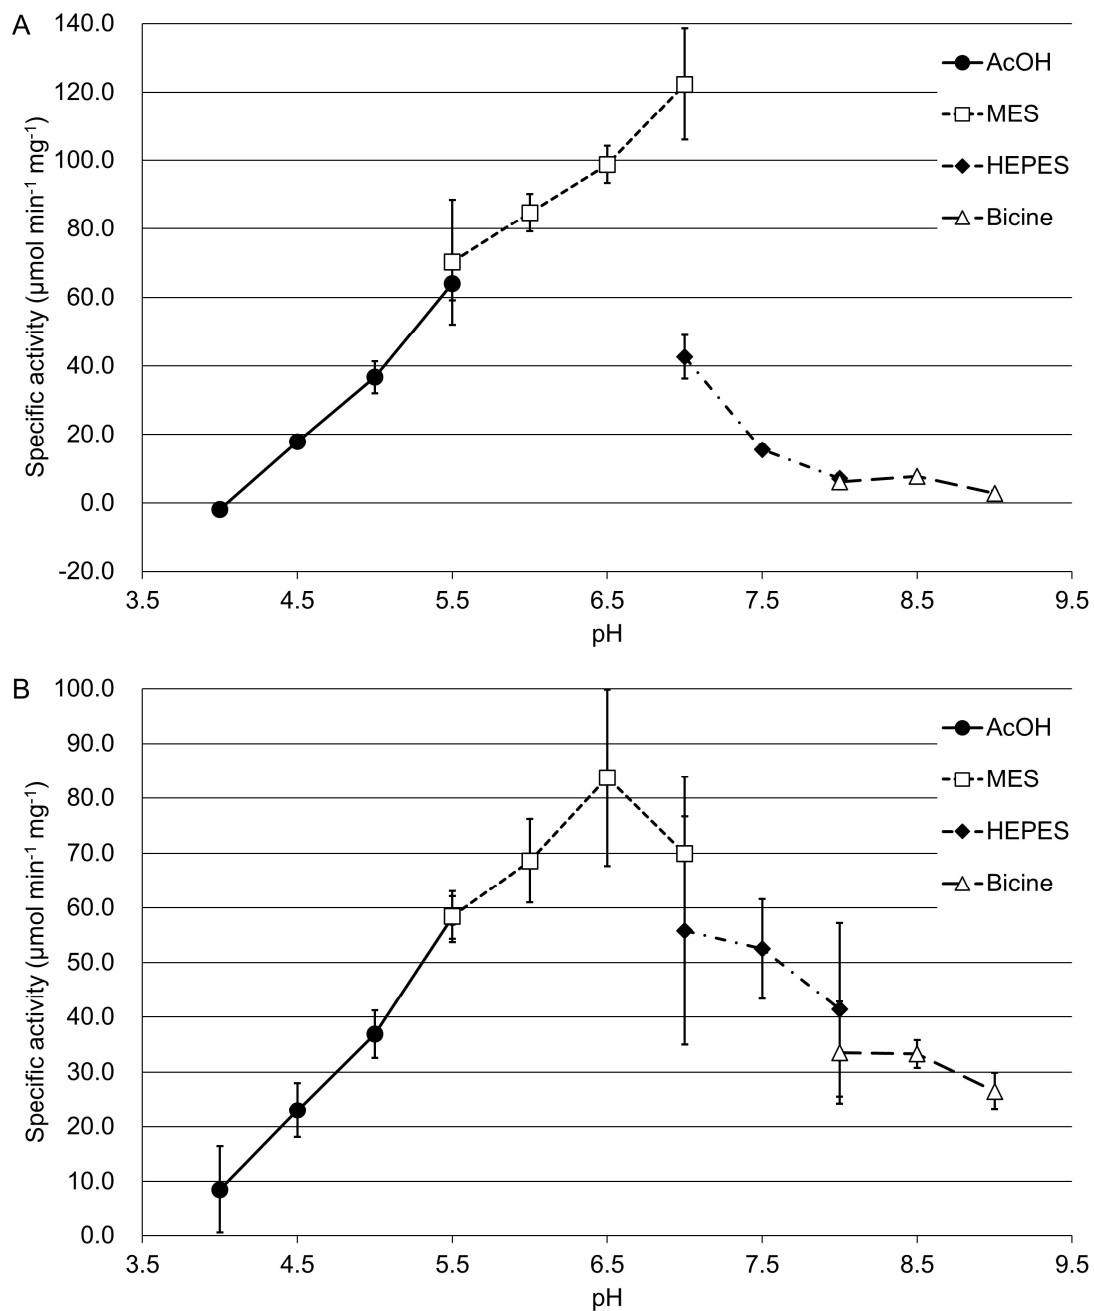

**Fig. S2. Effect of pH on the 2-PG phosphatase activity of the TK1734 and TK2301 proteins.** The phosphatase activities of the TK1734 (A) and TK2301 (B) recombinant proteins were measured in mixtures based on various buffers with concentrations of 50 mM. Symbols: closed circles, acetate-NaOH (pH 4.0-5.5); open squares, MES-NaOH (pH 5.5-7.0); closed diamonds, HEPES-NaOH (pH 7.0-8.0); open triangles, Bicine-NaOH (pH 8.0-9.0). The data represent the average of three independent experiments and are shown with the SD values.

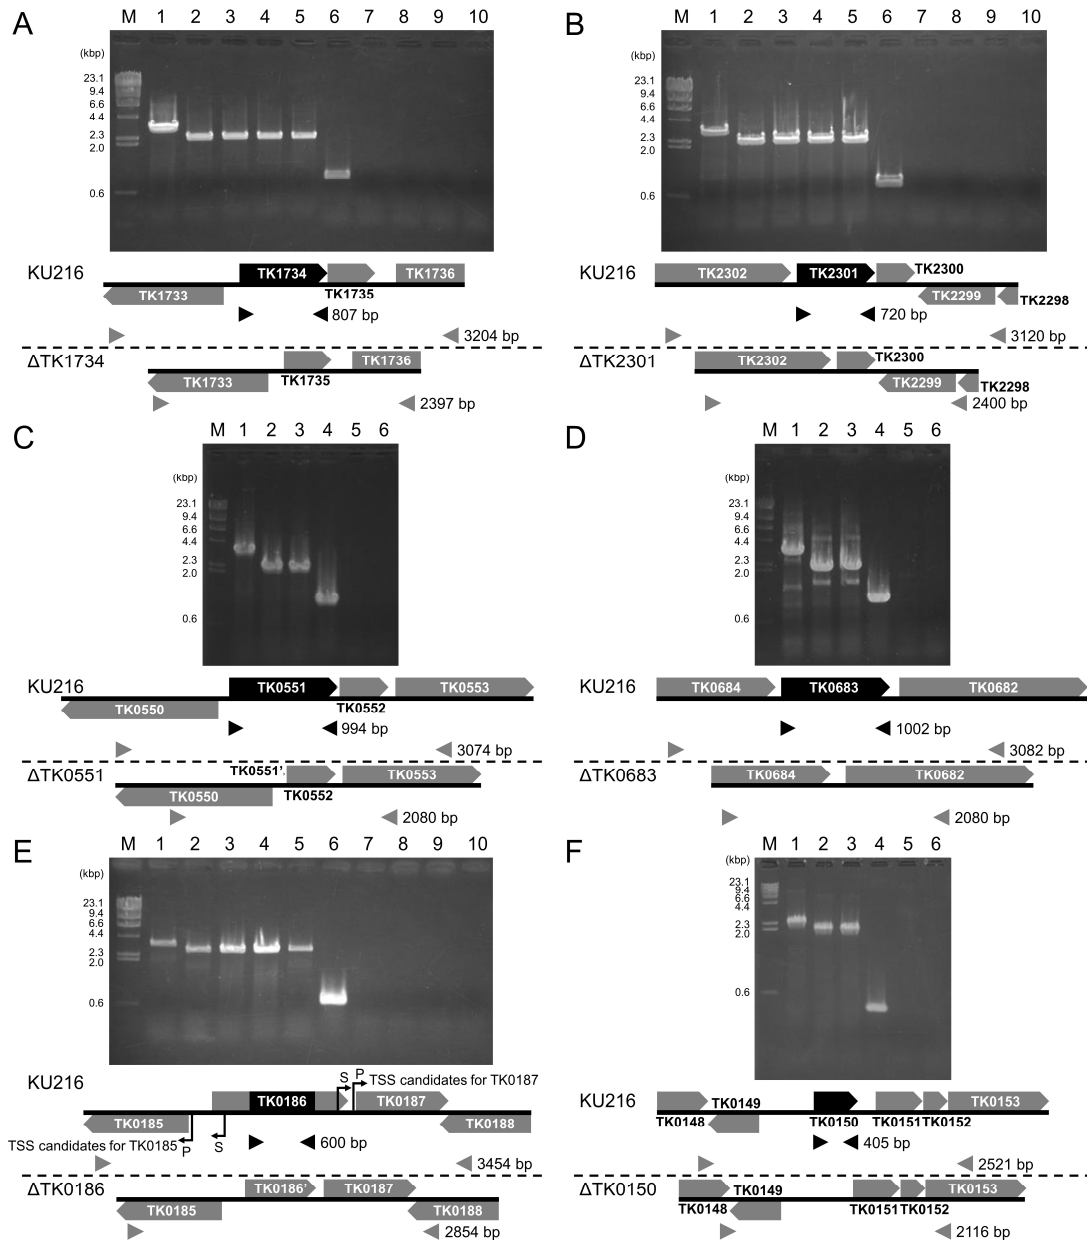

**Fig. S3. PCR analysis of the gene disruption strains.** The genotypes of individual gene disruption strains were analyzed by PCR using primer sets annealing outside of the 5'- and 3'-homologous regions for homologous recombination (outside pair, indicated by gray arrowheads) and the 5'- and 3'-terminal regions of the coding region of the target genes (inside pair, indicated by black arrowheads). (A) Lanes 1-5: outside, lanes 6-10: inside. Lanes 1, 6: *T. kodakarensis* KU216, lanes 2, 7:  $\Delta$ TK1734-2, lanes 3, 8:  $\Delta$ TK1734-4, lanes 4, 9:  $\Delta$ TK1734-5, lanes 5, 10:  $\Delta$ TK1734-6. (B) Lanes 1-5: outside, lanes 6-10: inside. Lanes 1, 6: *T. kodakarensis* KU216, lanes 2, 7:  $\Delta$ TK2301-1, lanes 3, 8:  $\Delta$ TK2301-2, lanes 4, 9:  $\Delta$ TK2301-3, lanes 5, 10:  $\Delta$ TK2301-4. (C) Lanes 1-3: outside, lanes 4-6: inside. Lanes 1, 4: *T. kodakarensis* KU216, lanes 2, 5:  $\Delta$ TK0551-1, lanes 3, 6:  $\Delta$ TK0551-2. (D) Lanes 1-3: outside, lanes 4-6: inside. Lanes 1, 4: *T. kodakarensis* KU216, lanes 2, 5:  $\Delta$ TK0683-13, lanes 3, 6:  $\Delta$ TK0683-15. (E) Lanes 1-5: outside, lanes 6-10: inside. Lanes 1, 6: *T. kodakarensis* KU216, lanes 2, 7:  $\Delta$ TK0186-17, lanes 3, 8:  $\Delta$ TK0186-25, lanes 4, 9:  $\Delta$ TK0186-28, lanes 5, 10:  $\Delta$ TK0186-33. Arrows P and S represent primary and secondary transcription initiation sites, respectively (18). (F) Lanes 1-3: outside, lanes 4-6: inside. Lanes 1, 4: *T. kodakarensis* KU216, lanes 2, 5:  $\Delta$ TK0150-3, lanes 3, 6:  $\Delta$ TK0150-26.  $\lambda$ DNA digested with HindIII was used as a DNA marker (M).

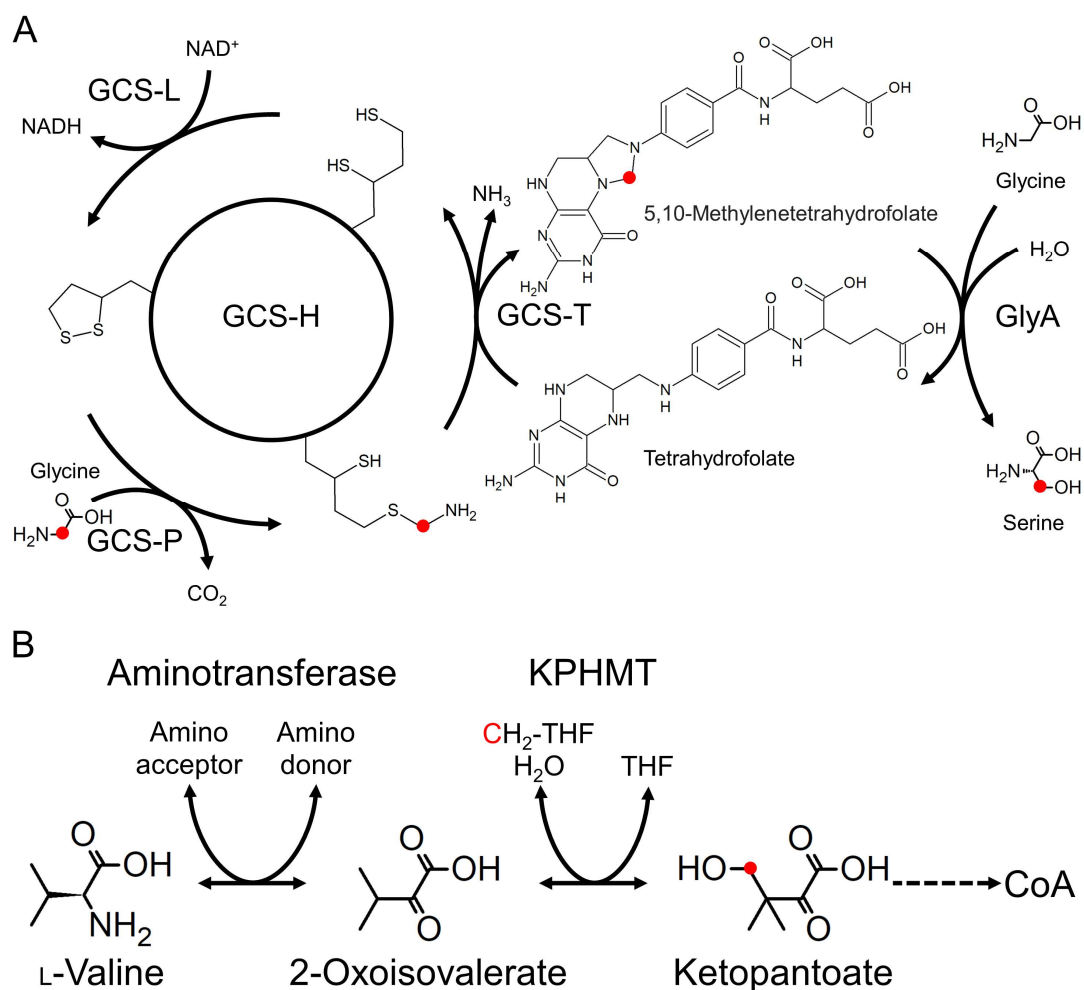

**Fig. S4. C1 transfer reactions in *T. kodakarensis*.** (A) The glycine cleavage system and C1 transfer. The glycine cleavage system is composed of four components: T-protein (aminomethyltransferase), P-protein (glycine decarboxylase), L-protein (dihydrolipooyl dehydrogenase) and H-protein, a protein modified with lipoic acid that interacts with all other components. In the system, P-protein first transfers an aminomethyl group from glycine onto the lipoic acid, which is attached to the H-protein linked with decarboxylation. Next, T-protein transfers the methylene carbon onto a tetrahydrofolate (THF) molecule, releasing ammonia and generating 5,10-methylenetetrahydrofolate (CH<sub>2</sub>-THF). The reduced lipoic acid through the reactions of P- and T-protein is re-oxidized by L-protein utilizing NAD<sup>+</sup>. The produced CH<sub>2</sub>-THF is used as a C1 carrier for various C1 transfer reactions such as the serine hydroxymethyl transferase (GlyA) reaction. (B) Metabolism linking valine and coenzyme A biosynthesis. *T. kodakarensis* does not harbor a *de novo* synthesis pathway of 2-oxoisovalerate. Therefore, coenzyme A (CoA) biosynthesis in *T. kodakarensis* is dependent on 2-oxoisovalerate generation from valine. Valine is converted to 2-oxoisovalerate via transamination catalyzed by aminotransferases such as the TK0186 protein which was confirmed to display activity in this study. The produced 2-oxoisovalerate is next converted to ketopantoate by ketopantoate hydroxymethyltransferase (KPHMT). The reaction is known to utilize CH<sub>2</sub>-THF as a C1 donor. The growth measurements of  $\Delta$ TK0150 suggested that the KPHMT reaction shares the same C1 carrier with the GlyA reaction in *T. kodakarensis*.

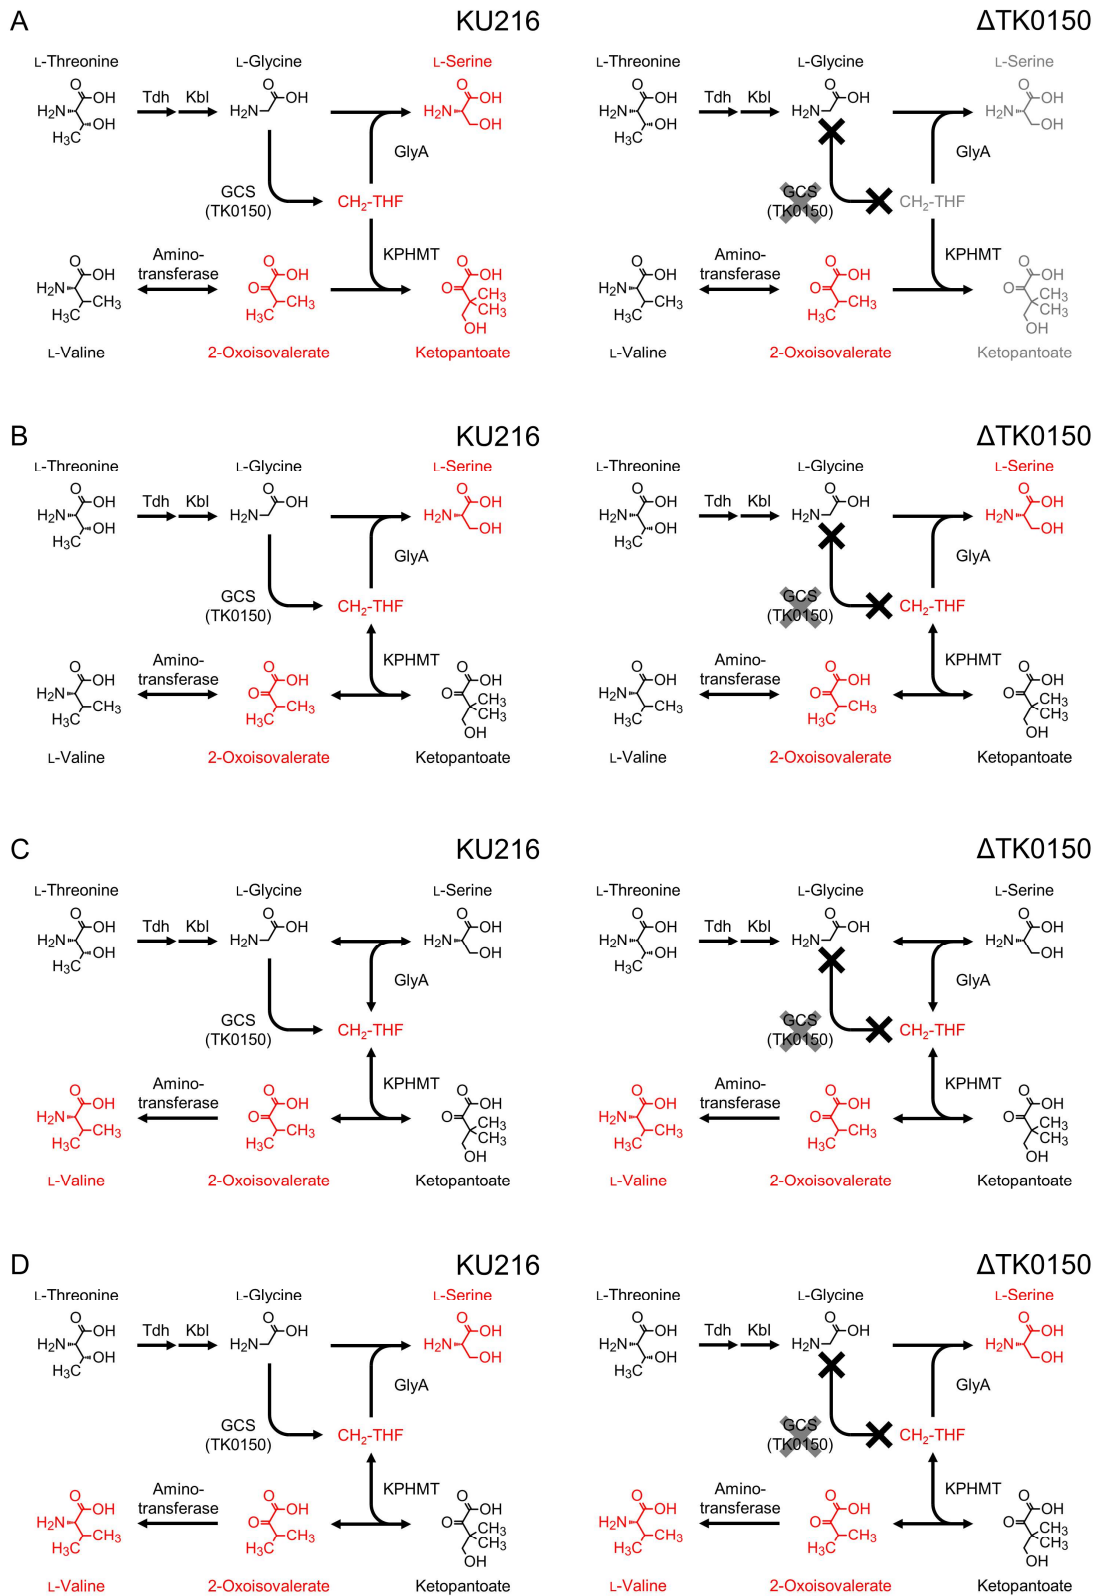

**Fig. S5. Metabolic links for 5,10-methylenetetrahydrofolate generation and utilization.** Compounds colored in black indicate the components present in the medium. Compounds colored in red (or gray) indicate those expected to be (or not to be) synthesized in the corresponding cells (KU216/ $\Delta$ TK0150). (A) ASW-AA-S<sup>0</sup>-Ura<sup>+</sup>-Ser<sup>-</sup> medium. (B) ASW-AA-S<sup>0</sup>-

Ura<sup>+</sup>-Ser<sup>-</sup> medium with ketopantoate. (C) ASW-AA-S<sup>0</sup>-Ura<sup>+</sup>-Val<sup>-</sup> medium with ketopantoate. (D)  
ASW-AA-S<sup>0</sup>-Ura<sup>+</sup>-Ser<sup>-</sup>-Val<sup>-</sup> medium with ketopantoate.

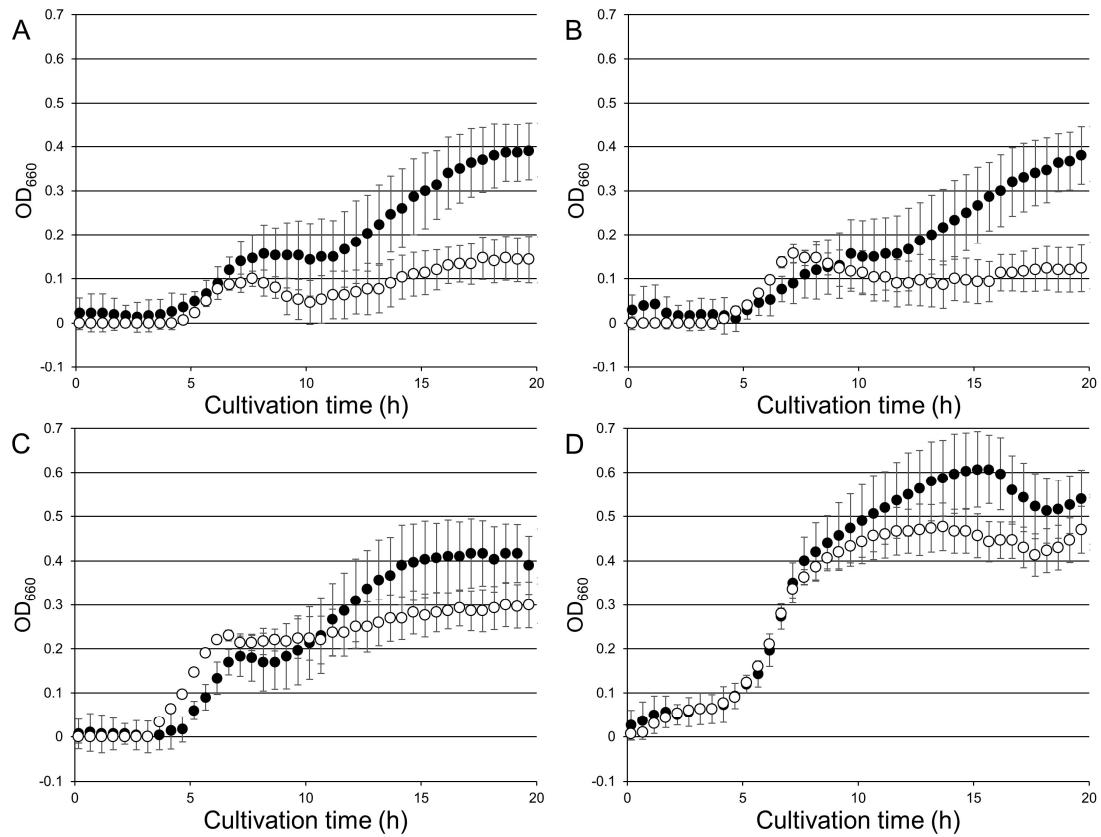

**Fig. S6. Growth properties of *T. kodakarensis* KU216 and  $\Delta$ TK1734 strains under microaerobic conditions.** KU216 (closed circles) and  $\Delta$ TK1734 (open circles) strains were cultivated in 10 mL ASW-YT-m1-Pyr medium in 20-mL vials supplemented with 25 g L<sup>-1</sup> uridine. All media were left in an anaerobic box for 24 h prior to inoculation to allow dissolved gases to equilibrate with the atmosphere in the anaerobic box (oxygen concentration: ~0.1%). Media for A were prepared without Na<sub>2</sub>S (microaerobic conditions), and the concentration of Na<sub>2</sub>S in B, C and D were 0.08 mM, 0.16 mM and 0.32 mM, respectively. Error bars indicate the SD values of three independent culture experiments.

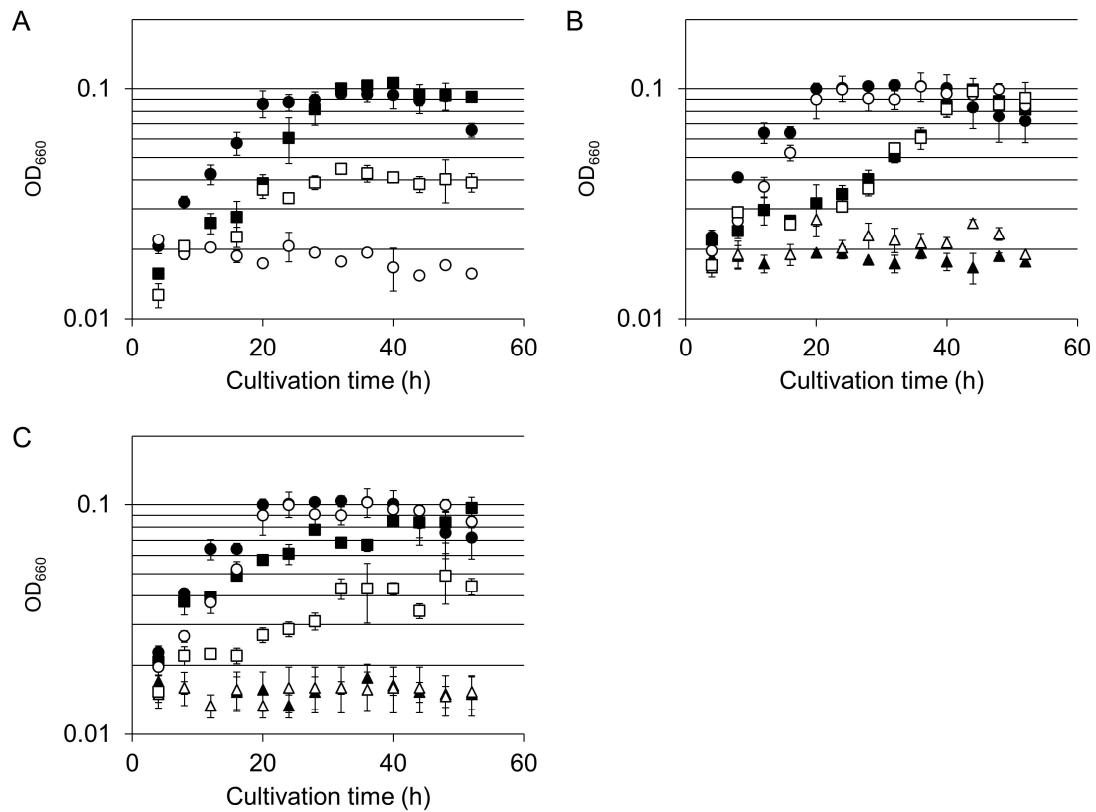

**Fig. S7. Growth properties of *T. kodakarensis* KU216 and  $\Delta$ TK0150 strains.** (A) Effects of ketopantoate on serine auxotrophy were examined by cultivating cells in ASW-AA-S<sup>0</sup>-Ura<sup>+</sup>-Ser<sup>-</sup> medium with or without 2 mM ketopantoate. Symbols: KU216 with (closed squares) or without ketopantoate (closed circles),  $\Delta$ TK0150 with (open squares) or without ketopantoate (open circles). (B) Effects of ketopantoate on valine auxotrophy was examined by cultivating cells in ASW-AA-S<sup>0</sup>-Ura<sup>+</sup>-Val<sup>-</sup> medium with or without 2 mM ketopantoate. Symbols: KU216 with valine (closed circles), without valine and with (closed squares) or without (closed triangles) ketopantoate,  $\Delta$ TK0150 with valine (open circles), without valine and with (open squares) or without (open triangles) ketopantoate. (C) Effects of ketopantoate in ASW-AA-S<sup>0</sup>-Ura<sup>+</sup>-Ser<sup>-</sup>-Val<sup>-</sup> medium with or without 2 mM ketopantoate. Symbols: KU216 with serine and valine (closed circles), without serine and valine, and with (closed squares) or without (closed triangles) ketopantoate,  $\Delta$ TK0150 with serine and valine (open circles), without serine and valine, and with (open squares) or without (open triangles) ketopantoate. Error bars indicate the SD values of three independent culture experiments.

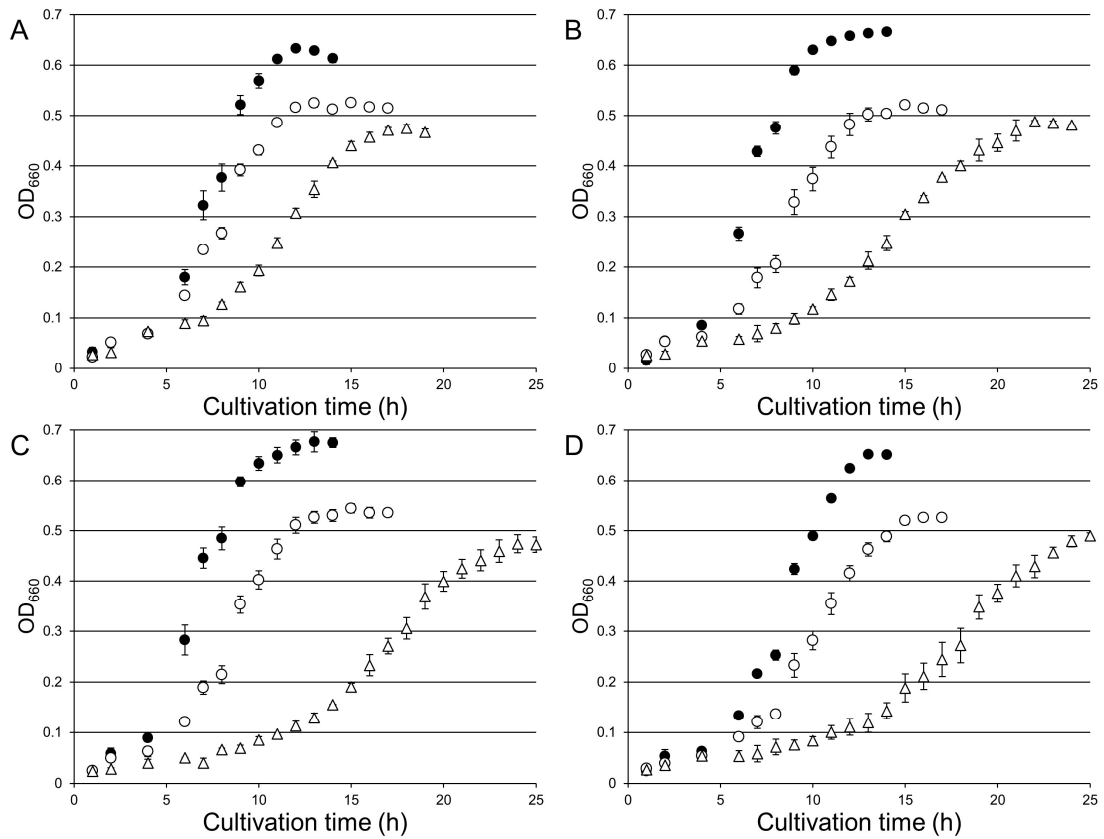

**Fig. S8. Growth properties of *T. kodakarensis* KU216,  $\Delta$ TK0683 and  $\Delta$ TK0150 strains under microaerobic conditions.** KU216 (closed circles),  $\Delta$ TK0683 (open circles) and  $\Delta$ TK0150 (open triangles) strains were cultivated in 10 mL ASW-YT-m1-Pyr medium in 30-mL test tubes. All media were left in an anaerobic box for 24 h prior to inoculation to allow dissolved gases to equilibrate with the atmosphere in the anaerobic box (oxygen concentration:  $\sim$ 0.1%). Media for A was prepared without  $\text{Na}_2\text{S}$  (microaerobic conditions), and the concentration of  $\text{Na}_2\text{S}$  in B, C and D were 0.08 mM, 0.16 mM and 0.32 mM, respectively. Error bars indicate the SD values of three independent culture experiments.



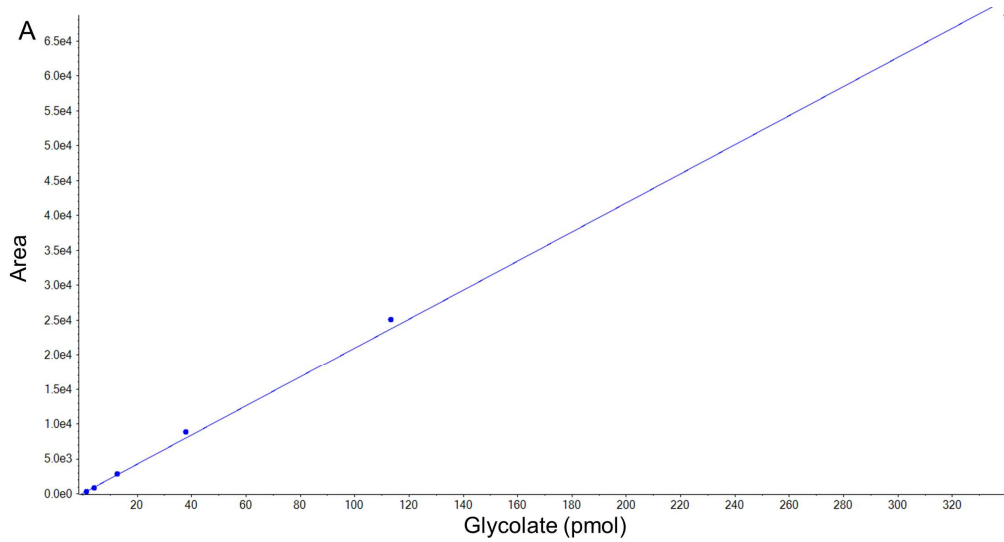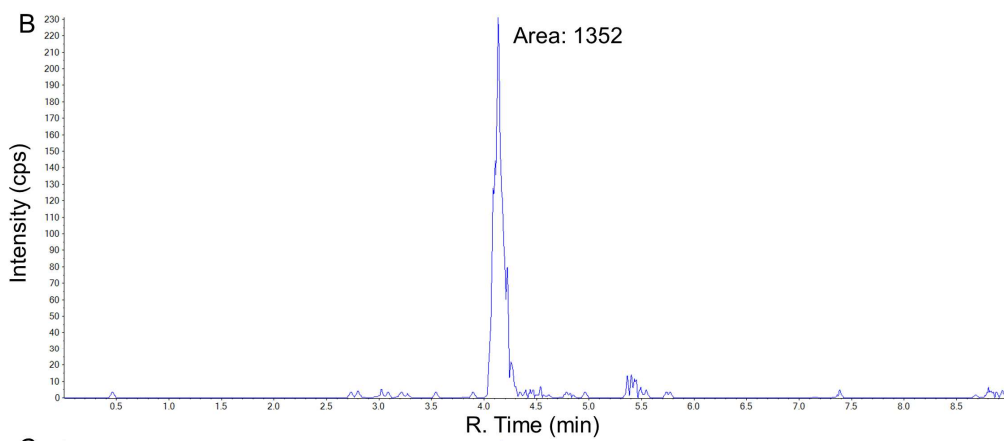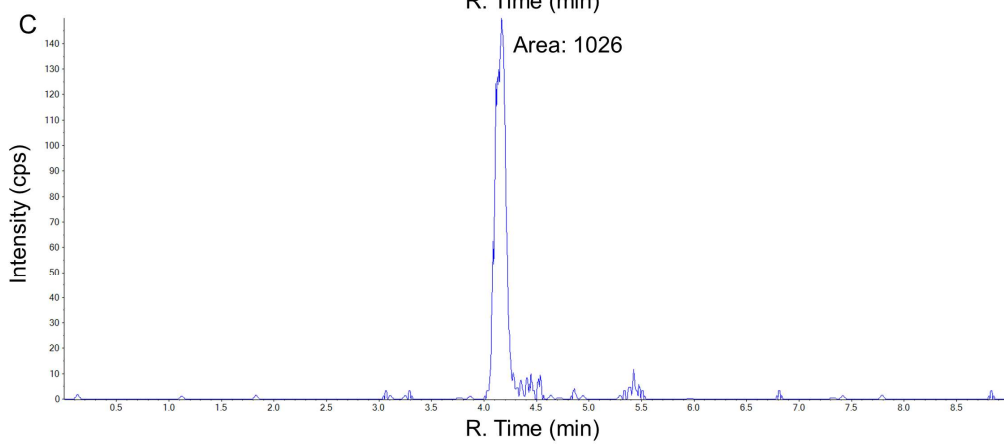

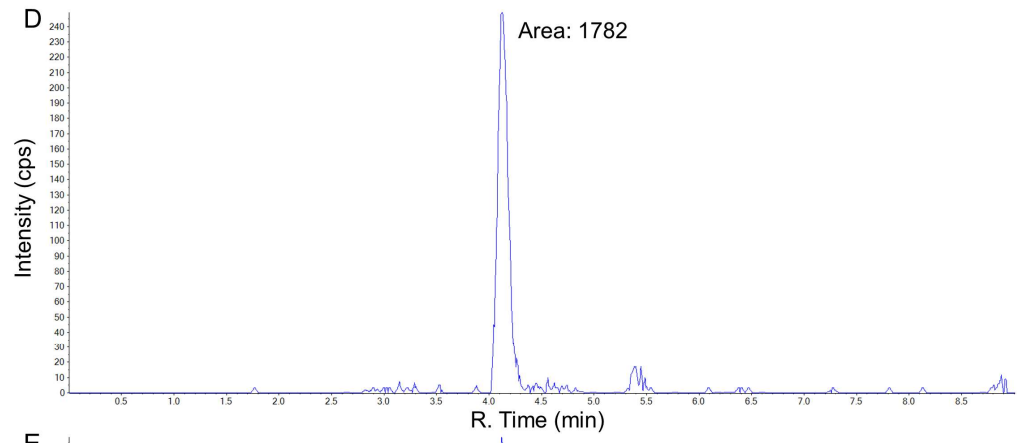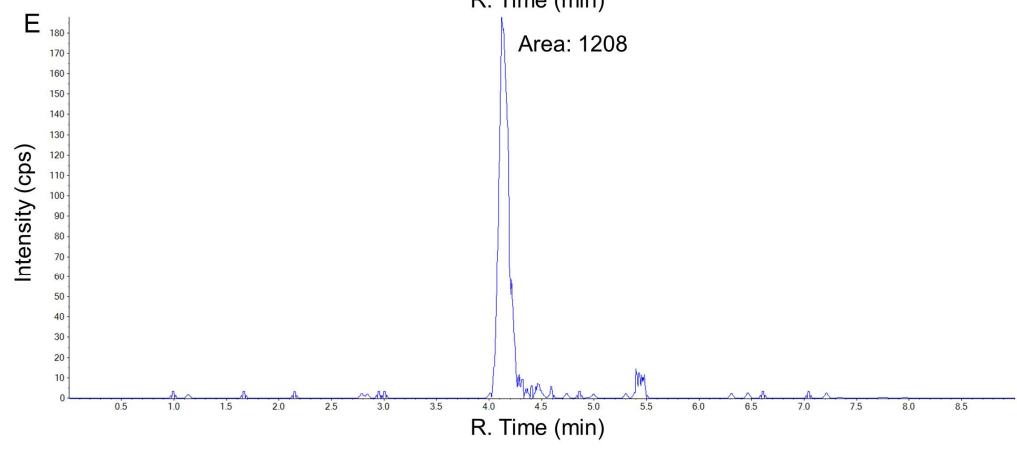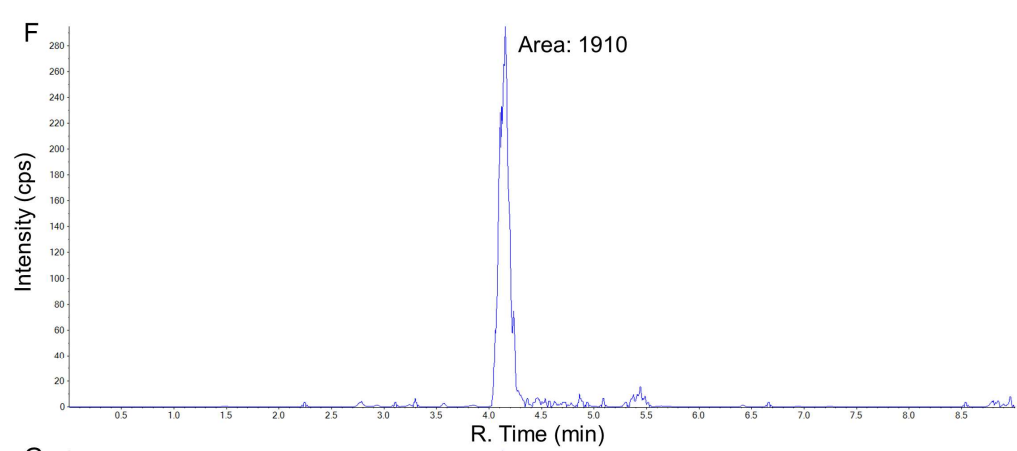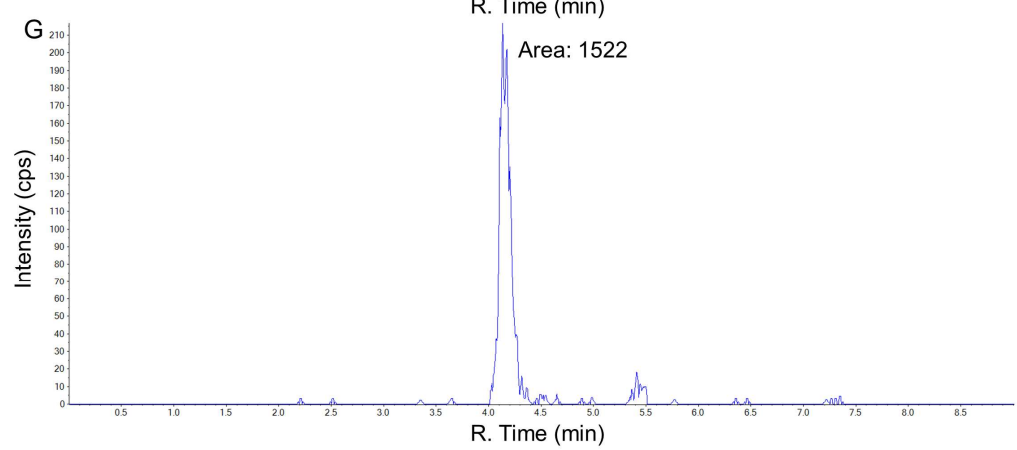

**Fig. S9. Detection of glycolate in the culture supernatant after growth of *T. kodakarensis* KU216 under microaerobic conditions.** The concentration of glycolate in the medium was examined by LC–MS/MS as described in the Methods section included in *SI Appendix*. *A* Calibration curve of amount of glycolate with peak area. Three sets of experiments were performed (*B/C*), (*D/E*) and (*F/G*). Each set represents data from medium with (*B*, *D*, *F*) or without (*C*, *E*, *G*) cell inoculation. Media in each set, including that used for pre-culture, were prepared together. Based on peak area, concentrations of glycolate deriving from *T. kodakarensis* were calculated as follows:  $B (24.414 \mu\text{M}) - C (18.163 \mu\text{M}) = 6.251 \mu\text{M}$ ,  $D (32.652 \mu\text{M}) - E (21.656 \mu\text{M}) = 10.996 \mu\text{M}$ ,  $F (35.112 \mu\text{M}) - G (27.677 \mu\text{M}) = 7.435 \mu\text{M}$ .

## SI References

1. R. G. Matthews, J. T. Drummond, Providing one-carbon units for biological methylations - Mechanistic studies on serine hydroxymethyltransferase, methylenetetrahydrofolate reductase, and methyltetrahydrofolate-homocysteine methyltransferase. *Chem. Rev.* **90**, 1275-1290 (1990).
2. J. H. Teller, S. G. Powers, E. E. Snell, Ketopantoate hydroxymethyltransferase. I. Purification and role in pantothenate biosynthesis. *J. Biol. Chem.* **251**, 3780-3785 (1976).
3. S. G. Powers, E. E. Snell, Ketopantoate hydroxymethyltransferase. II. Physical, catalytic, and regulatory properties. *J. Biol. Chem.* **251**, 3786-3793 (1976).
4. H. Myllykallio *et al.*, An alternative flavin-dependent mechanism for thymidylate synthesis. *Science* **297**, 105-107 (2002).
5. M. S. Chen, L. Schirch, Serine transhydroxymethylase. *J. Biol. Chem.* **248**, 7979-7984 (1973).
6. H. Tomita, T. Imanaka, H. Atomi, Identification and characterization of an archaeal ketopantoate reductase and its involvement in regulation of coenzyme A biosynthesis. *Mol. Microbiol.* **90**, 307-321 (2013).
7. T. Shimosaka, K. S. Makarova, E. V. Koonin, H. Atomi, Identification of dephospho-coenzyme A (dephospho-CoA) kinase in *Thermococcus kodakarensis* and elucidation of the entire CoA biosynthesis pathway in Archaea. *mBio* **10**, e01146-01119 (2019).
8. T. Sato, T. Fukui, H. Atomi, T. Imanaka, Targeted gene disruption by homologous recombination in the hyperthermophilic archaeon *Thermococcus kodakaraensis* KOD1. *J. Bacteriol.* **185**, 210-220 (2003).
9. Y. Fukuyama *et al.*, Development of a rapid and highly accurate method for <sup>13</sup>C tracer-based metabolomics and its application on a hydrogenotrophic methanogen. *ISME Commun.* **4**, ycad006 (2024).
10. J. Han, S. Gagnon, T. Eckle, C. H. Borchers, Metabolomic analysis of key central carbon metabolism carboxylic acids as their 3-nitrophenylhydrazones by UPLC/ESI-MS. *Electrophoresis* **34**, 2891-2900 (2013).
11. H. Hong, W. Li, X. Li, B. Huang, D. Shi, Determination of glycolic acid in natural seawater by liquid chromatography coupled with triple quadrupole mass spectrometry. *Limnol. Oceanogr. Methods* **15**, 631-641 (2017).
12. H. Atomi, T. Fukui, T. Kanai, M. Morikawa, T. Imanaka, Description of *Thermococcus kodakaraensis* sp. nov., a well studied hyperthermophilic archaeon previously reported as *Pyrococcus* sp. KOD1. *Archaea* **1**, 263-267 (2004).
13. T. Sato, T. Fukui, H. Atomi, T. Imanaka, Improved and versatile transformation system allowing multiple genetic manipulations of the hyperthermophilic archaeon *Thermococcus kodakaraensis*. *Appl. Environ. Microbiol.* **71**, 3889-3899 (2005).
14. Y. Su, Y. Michimori, H. Atomi, Biochemical and genetic examination of two aminotransferases from the hyperthermophilic archaeon *Thermococcus kodakarensis*. *Front. Microbiol.* **14**, 1126218 (2023).
15. T. Kanai *et al.*, Distinct physiological roles of the three [NiFe]-hydrogenase orthologs in the hyperthermophilic archaeon *Thermococcus kodakarensis*. *J. Bacteriol.* **193**, 3109-3116 (2011).
16. Y. Yokooji, H. Tomita, H. Atomi, T. Imanaka, Pantoate kinase and phosphopantothenate synthetase, two novel enzymes necessary for CoA biosynthesis in the Archaea. *J. Biol. Chem.* **284**, 28137-28145 (2009).
17. Y. Makino *et al.*, An archaeal ADP-dependent serine kinase involved in cysteine biosynthesis and serine metabolism. *Nat. Commun.* **7**, 13446 (2016).
18. D. Jager, K. U. Forstner, C. M. Sharma, T. J. Santangelo, J. N. Reeve, Primary transcriptome map of the hyperthermophilic archaeon *Thermococcus kodakarensis*. *BMC Genomics* **15**, 684 (2014).
